# Supplementary material for: Two-dimensional (2D) layered double metal cyanides as alternative catalysts for CO2/propylene oxide copolymerization
Source: Royal Society of Chemistry journal article supplement (doi:10.1039/d3cy00753g), 2023-01-01
Supplement: d3cy00753g1.pdf [file d3cy00753g1.pdf]

# Supplementary Information

## Two-dimensional (2D) layered double metal cyanide as catalysts for CO<sub>2</sub>-epoxide copolymerization

Guillermo Penche<sup>a</sup>, María P. González-Marcos<sup>\*a</sup>, Juan R. González-Velasco<sup>a</sup>, Cyler W. Vos<sup>b</sup>,  
Christopher M. Kozak<sup>b</sup>

<sup>a</sup>Department of Chemical Engineering, Faculty of Science and Technology, University of the Basque Country, UPV/EHU, Barrio Sarriena s/n, 48940-Leioa, Bizkaia, Spain

<sup>b</sup>Department of Chemistry, Memorial University of Newfoundland, St. John's, NL, Canada A1B 3X7.

\*Corresponding author. e-mail: [mp.gonzalezmarcos@ehu.eus](mailto:mp.gonzalezmarcos@ehu.eus)

|                                                                                                                                                                                                                                                                                                                                                   |     |
|---------------------------------------------------------------------------------------------------------------------------------------------------------------------------------------------------------------------------------------------------------------------------------------------------------------------------------------------------|-----|
| <b>Fig. S1.</b> Assignment of the <sup>1</sup> H-NMR spectrum of a typical product of the copolymerization of CO <sub>2</sub> and PO in the presence of a DMC catalyst. a) Full spectrum and b) region between 1.2 ppm and 1.4 ppm. ....                                                                                                          | S1  |
| <b>Fig. S2.</b> Representative <sup>1</sup> H-NMR spectrum of the fresh product of the copolymerization of CO <sub>2</sub> and PO in the presence of a DMC catalyst. ....                                                                                                                                                                         | S2  |
| <b>Fig. S3.</b> Relationship between the ν(CN) band frequency in the 2D layered DMCs and a) the polarizing power of the M' metal (R <sup>2</sup> =0.9962) or b) the electronegativity of the M' metal (R <sup>2</sup> = 0.9918). Electronegativity and polarizing power values extracted from Zhang's work. ....                                  | S3  |
| <b>Fig. S4.</b> Full vibrational a) Infrared and b) Raman spectra of the studied 2D layered DMC materials in the hexahydrate form. Inset: Raman low-frequency spectral region. ....                                                                                                                                                               | S3  |
| <b>Fig. S5.</b> HT-XRD plots of the synthesized 2D layered DMC materials in air: a) Ni-Ni, b) Co-Ni, c) Fe-Ni and d) Mn-Ni. Color code: green (hexahydrate form), cyan (mix of hexa- and trihydrate forms), blue (trihydrate form), magenta (mix of tri- and dehydrated forms), red (dehydrated form), and black (product of decomposition). .... | S5  |
| <b>Fig. S6.</b> HT-XRD plots of the synthesized 2D layered DMC materials in vacuum: a) Ni-Ni, b) Co-Ni, c) Fe-Ni, and d) Mn-Ni. Color code: blue (trihydrate form), magenta (mix of tri- and dehydrated forms) and red (dehydrated form). ....                                                                                                    | S6  |
| <b>Fig. S7.</b> TGA curves of the studied 2D layered DMC materials in the range between 25 °C and 175 °C in a) air and b) N <sub>2</sub> . ....                                                                                                                                                                                                   | S7  |
| <b>Fig. S8.</b> TEM images of the studied 2D layered DMC materials at different magnifications. ....                                                                                                                                                                                                                                              | S8  |
| <b>Fig. S9.</b> TEM images of the Mn-Ni sample at a) 5000 and b) 2000 magnifications. ....                                                                                                                                                                                                                                                        | S8  |
| <b>Fig. S10.</b> N <sub>2</sub> adsorption-desorption isotherms of the studied 2D layered DMC materials. ....                                                                                                                                                                                                                                     | S9  |
| <b>Fig. S11.</b> N <sub>2</sub> adsorption-desorption isotherms of the Ni-Ni sample at different pretreatment temperatures. ....                                                                                                                                                                                                                  | S9  |
| <b>Fig. S12.</b> NH <sub>3</sub> -TPD profiles of the studied 2D layered DMC materials in the temperature range between 100 and 350 °C. ....                                                                                                                                                                                                      | S11 |
| <b>Fig. S13.</b> Number-weighted in-plane size (L) distribution of the studied 2D layered DMC materials. ....                                                                                                                                                                                                                                     | S12 |

|    |                                                                                                                           |     |
|----|---------------------------------------------------------------------------------------------------------------------------|-----|
| 43 | <b>Fig. S14.</b> Number-weighted lateral size ( <i>t</i> ) distribution of the studied 2D layered DMC                     |     |
| 44 | materials..                                                                                                               | S12 |
| 45 | <b>Fig. S15.</b> SEC curves (log <i>M<sub>w</sub></i> ) of the copolymers produced by the studied 2D layered              |     |
| 46 | materials. <b>a)</b> At 90 °C and <b>b)</b> at 120 °C.....                                                                | S17 |
| 47 | <b>Fig. S16.</b> Relationship between electronegativity of the <i>M'</i> metal and a) PO conversion                       |     |
| 48 | and b) CO <sub>2</sub> selectivity. Electronegativity values were extracted from the Zhang scale                          |     |
| 49 | .....                                                                                                                     | S18 |
| 50 | <b>Fig. S17.</b> Relationship between dehydration temperature and <b>a)</b> PO conversion and <b>b)</b>                   |     |
| 51 | CO <sub>2</sub> selectivity.....                                                                                          | S18 |
| 52 | <b>Fig. S18.</b> <sup>1</sup> H-NMR spectrum of the product derived from the Ni-Ni catalyst at 90 °C...                   |     |
| 53 | .....                                                                                                                     | S19 |
| 54 | <b>Fig. S19.</b> <sup>1</sup> H-NMR spectrum of the product derived from the Ni-Ni catalyst at 120 °C.                    |     |
| 55 | .....                                                                                                                     | S19 |
| 56 | <b>Fig. S20.</b> <sup>1</sup> H-NMR spectrum of the product derived from the Co-Ni catalyst at 90 °C...                   |     |
| 57 | .....                                                                                                                     | S20 |
| 58 | <b>Fig. S21.</b> <sup>1</sup> H-NMR spectrum of the product derived from the Co-Ni catalyst at 120 °C.                    |     |
| 59 | .....                                                                                                                     | S20 |
| 60 | <b>Fig. S22.</b> <sup>1</sup> H-NMR spectrum of the product derived from the Fe-Ni catalyst at 90 °C...                   |     |
| 61 | .....                                                                                                                     | S21 |
| 62 | <b>Fig. S23.</b> <sup>1</sup> H-NMR spectrum of the product derived from the Fe-Ni catalyst at 120 °C..                   |     |
| 63 | .....                                                                                                                     | S21 |
| 64 | <b>Fig. S24.</b> <sup>1</sup> H-NMR spectrum of the product derived from the Mn-Ni catalyst at 90 °C...                   |     |
| 65 | .....                                                                                                                     | S22 |
| 66 | <b>Fig. S25.</b> <sup>1</sup> H-NMR spectrum of the product derived from the Mn-Ni catalyst at 120 °C..                   |     |
| 67 | .....                                                                                                                     | S22 |
| 68 | <b>Fig. S26.</b> Reactor temperature-time profiles for entry 1 (Table 5). .....                                           | S23 |
| 69 | <b>Fig. S27.</b> <sup>1</sup> H-NMR region corresponding to the methyl resonance of PC (1.475-1.53 ppm)                   |     |
| 70 | for entry 5 and entry 6 (Table 5), and entry 3 (Table 4).....                                                             | S23 |
| 71 | <b>Fig. S28.</b> NH <sub>3</sub> -TPD profiles of the Zn-Co DMC and Co-Ni DMC complexes in the                            |     |
| 72 | temperature range between 100 and 350 °C. ....                                                                            | S24 |
| 73 | <b>Fig. S29.</b> IR spectra of reaction mixture during the copolymerization of CO <sub>2</sub> and PO in                  |     |
| 74 | the presence of the Co-Ni DMC catalyst.....                                                                               | S25 |
| 75 | <b>Fig. S30.</b> IR spectra of reaction mixture during the copolymerization of CO <sub>2</sub> and PO in                  |     |
| 76 | the presence of the Zn-Co DMC catalyst.....                                                                               | S25 |
| 77 | <b>Fig. S31.</b> Basic characterization of the Zn-Co DMC catalyst. <b>a)</b> XRD spectrum, <b>b)</b> FT-IR                |     |
| 78 | spectrum (Inset: ν(CN) spectral region), <b>c)</b> N <sub>2</sub> physisorption isotherm and <b>d)</b> SEM image.         |     |
| 79 | .....                                                                                                                     | S27 |
| 80 | <b>Table S1.</b> Assignment of the vibration modes related to the square planar [Ni(CN) <sub>4</sub> ] <sup>2-</sup> ion. |     |
| 81 | .....                                                                                                                     | S4  |
| 82 | <b>Table S2.</b> Textural properties of the Ni-Ni sample at different pretreatment temperatures.                          |     |
| 83 | .....                                                                                                                     | S10 |
| 84 | <b>Table S3.</b> Acid sites strength distribution for the studied 2D layered DMC materials..                              |     |
| 85 | .....                                                                                                                     | S11 |
| 86 | <b>Table S4.</b> Mode, median, mean ( <i>μ</i> ), standard deviation ( <i>σ</i> ), standard error (SE) and R-             |     |
| 87 | squared ( <i>R</i> <sup>2</sup> ) of the fitted peaks..                                                                   | S13 |
| 88 | <b>Table S5.</b> Comparison between experimental and expected values for surface area and                                 |     |
| 89 | acid sites density.....                                                                                                   | S14 |
| 90 | <b>Table S6.</b> Unit cell parameters, cell volume and calculated density of the trihydrate form                          |     |
| 91 | used for calculations.....                                                                                                | S15 |

|    |                                                                                         |     |
|----|-----------------------------------------------------------------------------------------|-----|
| 92 | <b>Table S7.</b> Chemical composition (in wt%) of the studied 2D layered DMC materials. |     |
| 93 | .....                                                                                   | S16 |
| 94 |                                                                                         |     |
| 95 |                                                                                         |     |

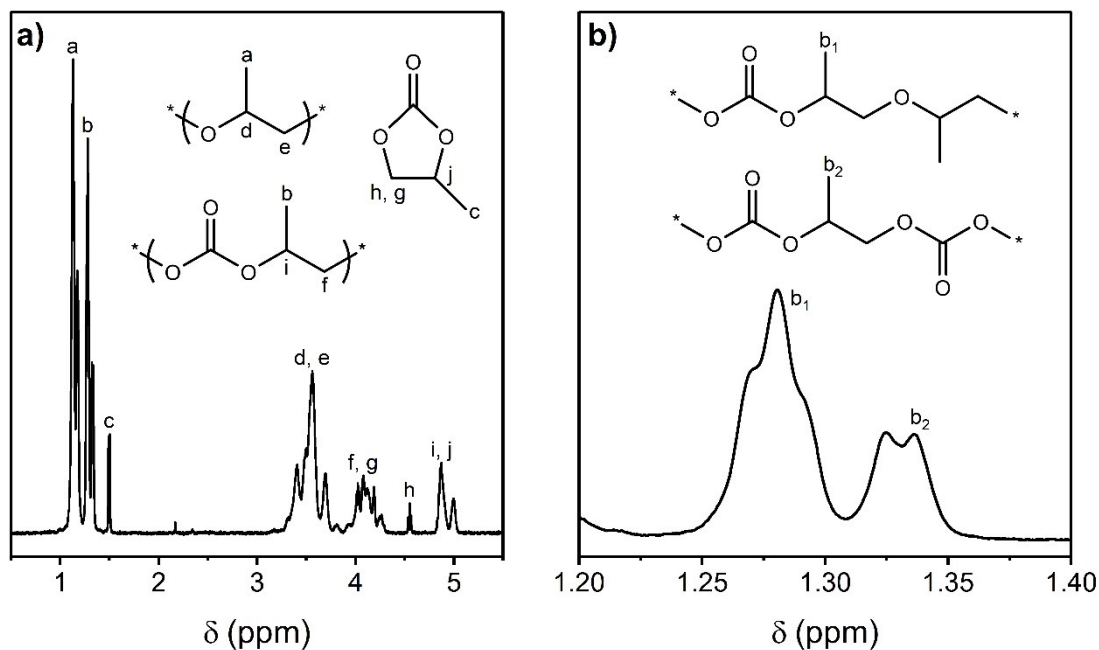

**Fig. S1.** Assignment of the  $^1\text{H}$ -NMR spectrum of a typical product of the copolymerization of  $\text{CO}_2$  and PO in the presence of a DMC catalyst; **a)** Full spectrum and **b)** region between 1.2 ppm and 1.4 ppm.

$F_{\text{CU}}$  was calculated by integration of the methyl resonances of polyether (1.14 ppm) and polycarbonate segments (1.3 ppm).

$$F_{\text{CU, mol\%}} = \frac{A_{1.3}}{A_{1.3} + A_{1.14}} \cdot 100 \quad (\text{S1})$$

$W_{\text{PC}}$  was determined considering the methyl resonance of PC (1.48 ppm).

$$W_{\text{PC, wt.\%}} = \frac{102 \cdot A_{1.48}}{58 \cdot A_{1.14} + 102 \cdot (A_{1.3} - A_{1.48})} \cdot 100 \quad (\text{S2})$$

$S_{\text{CO}_2}$  and  $S_{\text{PO}}$  were calculated by integrating all the NMR signals in the  $\text{CH}_3$  region.

$$S_{\text{CO}_2, \%} = \frac{A_{1.3}}{A_{1.3} + A_{1.48}} \cdot 100 \quad (\text{S4})$$

$$S_{\text{PO, \%}} = \frac{A_{1.14} + A_{1.3}}{A_{1.14} + A_{1.3} + A_{1.48}} \cdot 100 \quad (\text{S5})$$

$R_{\text{PEC}}$  was estimated from the two different resonances into which the signal corresponding to the  $\text{CH}_3$  protons in polycarbonate units (1.3 ppm) can be decomposed, following the formula:

$$R_{PEC}, \% = \frac{A_{1.28}}{A_{1.28} + A_{1.33}} \cdot 100 \quad (S6)$$

107 In a block copolymer, polyethercarbonate linkages would be limited to the block interface,  
 108 resulting in a  $R_{PEC}$  value approaching 0%. Conversely, for a copolymer with a more  
 109 random microstructure, this value should be closer to 100%.

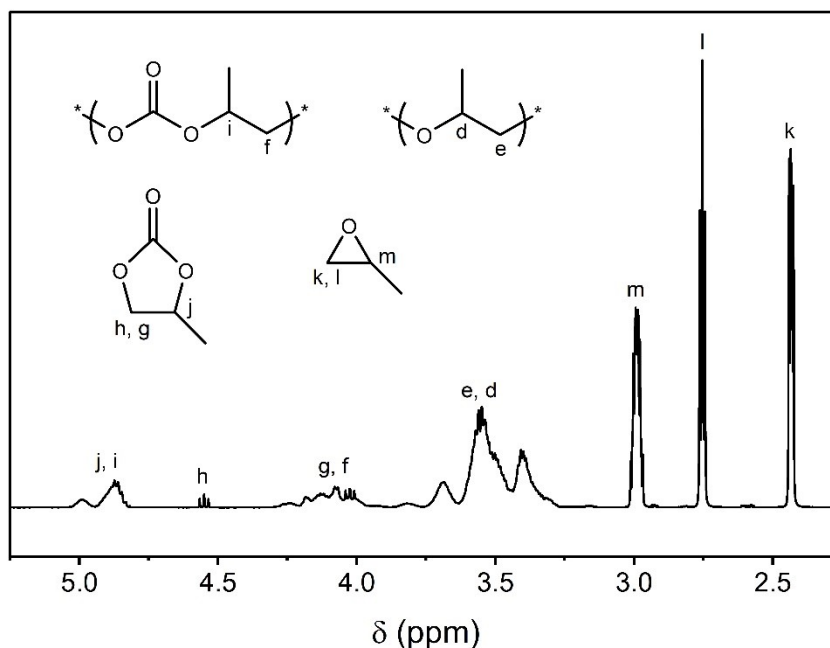

110  
 111 **Fig. S2.** Representative  $^1\text{H}$ -NMR spectrum of the fresh product of the copolymerization  
 112 of  $\text{CO}_2$  and PO in the presence of a DMC catalyst.

113  $X_{PO}$  conversion is determined by dividing copolymer and PC peaks integration by the  
 114 sum of copolymer, PC and PO peaks integrations.

$$X_{PO}, \% = \frac{A_{5.0} + A_{4.58} + A_{4.2} + A_{3.5}}{A_{5.0} + A_{4.58} + A_{4.2} + A_{3.5} + 3 \cdot A_{3.0}} \cdot 100 \quad (S7)$$

115

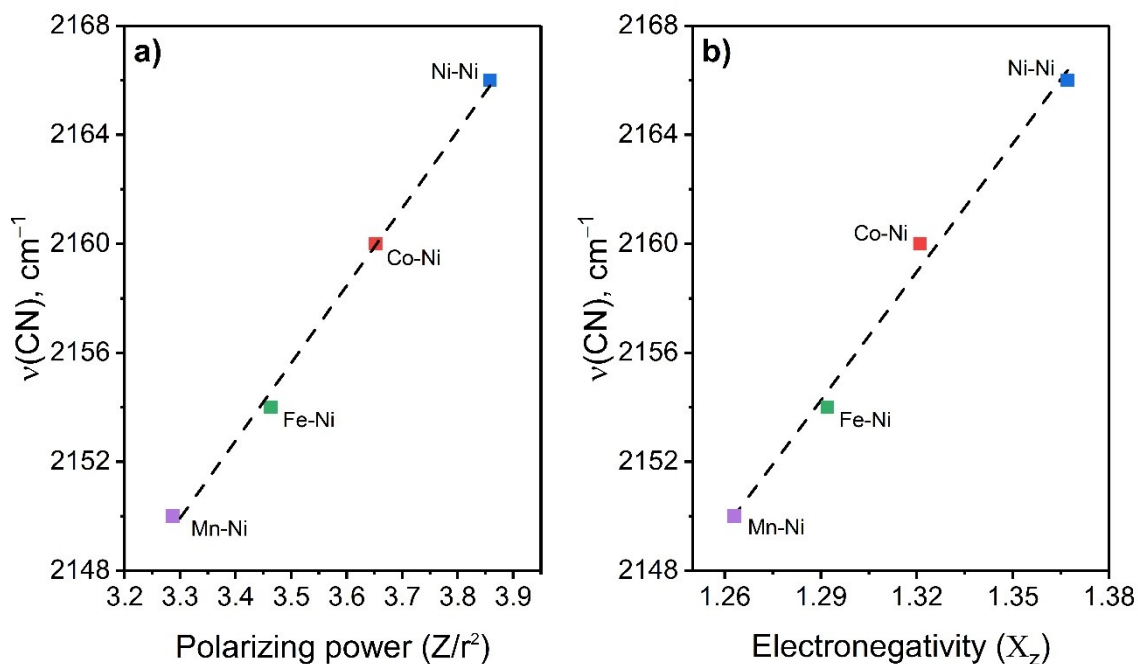

**Fig. S3.** Relationship between the  $\nu(\text{CN})$  band frequency in the 2D layered DMCs and **a)** the polarizing power of the M' metal ( $R^2=0.9962$ ) or **b)** the electronegativity of the M' metal ( $R^2= 0.9918$ ). Electronegativity and polarizing power values extracted from Zhang's work.<sup>1,2</sup>

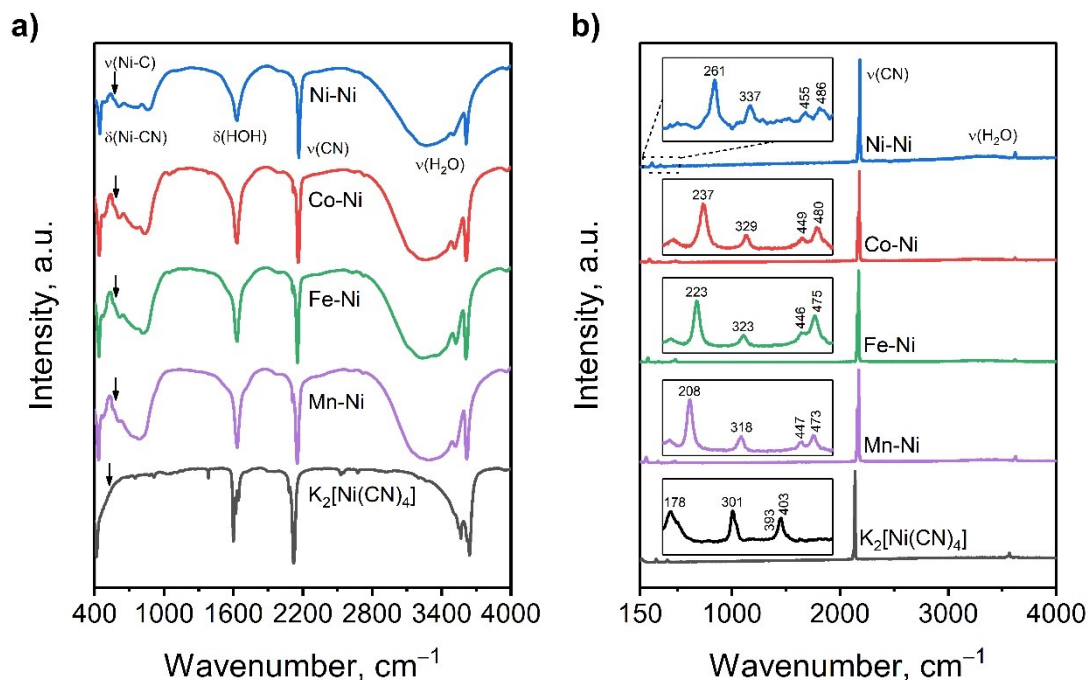

**Fig. S4.** Full vibrational **a)** Infrared and **b)** Raman spectra of the studied 2D layered DMC materials in the hexahydrate form. Insets: Raman low-frequency spectral region.

FT-IR and Raman spectra of the synthesized compounds comprise motions associated with the  $[\text{Ni}(\text{CN})_4]^{2-}$  ion and water molecules. The free  $[\text{Ni}(\text{CN})_4]^{2-}$  is a square planar ion with  $D_{4h}$  symmetry, consisting of 9 atoms and 21 fundamental modes. Those vibrational modes can be Raman active, IR active, or neither. The wavenumbers of IR and Raman vibrations related to the  $[\text{Ni}(\text{CN})_4]^{2-}$  are listed in **Table S1**. Assignments were made based on the bibliography.<sup>3</sup> As in the case of the  $\nu(\text{CN})$ , bands in the low-frequency regions shift to higher wavenumbers with the electron-withdrawing capacity of the  $M'$  metal.

**Table S1.** Assignment of the vibration modes related to the square planar  $[\text{Ni}(\text{CN})_4]^{2-}$  ion.

|                                           | $\text{K}_2[\text{Ni}(\text{CN})_4]$ | $\text{Ni}[\text{Ni}(\text{CN})_4]$ | $\text{Co}[\text{Ni}(\text{CN})_4]$ | $\text{Fe}[\text{Ni}(\text{CN})_4]$ | $\text{Mn}[\text{Ni}(\text{CN})_4]$ |
|-------------------------------------------|--------------------------------------|-------------------------------------|-------------------------------------|-------------------------------------|-------------------------------------|
| $\nu(\text{CN}), A_{1g} (\text{R})$       | 2140 s                               | 2184 s                              | 2179 s                              | 2173 s                              | 2171 s                              |
| $\nu(\text{CN}), B_{1g} (\text{R})$       | 2134 m                               | 2173 m                              | 2167 m                              | 2161 m                              | 2159 m                              |
| $\nu(\text{CN}), E_u (\text{IR})$         | 2122 s                               | 2166 s                              | 2160 s                              | 2154 s                              | 2152 s                              |
| $\nu(\text{Ni-C}), A_{1g} (\text{R})$     | 403 w                                | 486 w                               | 480 w                               | 475 w                               | 473 w                               |
| $\nu(\text{Ni-C}), B_{1g} (\text{R})$     | 393 w                                | 455 w                               | 449 w                               | 446 w                               | 447 w                               |
| $\delta(\text{Ni-CN}), B_{2g} (\text{R})$ | 178 w                                | 261 w                               | 237 w                               | 223 w                               | 208 w                               |
| $\pi(\text{Ni-CN}), E_g (\text{R})$       | 301 w                                | 337 w                               | 329 w                               | 323 w                               | 318 w                               |
| $\nu(\text{Ni-C}), E_u (\text{IR})$       | 543 w                                | 567 w                               | 561 w                               | 560 w                               | 558 w                               |
| $\delta(\text{Ni-CN}), E_u (\text{IR})$   | 418 s                                | 450 s                               | 442 s                               | 439 s                               | 435 s                               |
| $\pi(\text{Ni-CN}), A_{2u} (\text{IR})$   | 441 w                                | 482 w                               | 482 w                               | 477 w                               | 473 w                               |

m: medium; w: weak; s: strong

The presence of crystal water is indicated by  $\nu(\text{OH})$  and  $\delta(\text{HOH})$  motions, as well as weak to medium intensity bands between  $450\text{-}900\text{ cm}^{-1}$ , assigned to the rocking and wagging modes of  $\text{H}_2\text{O}$ . In the  $\nu(\text{OH})$  region, three adsorption bands emerge: a broad, weak band due to hydrogen-bonded water molecules, and two sharp, strong bands due to coordinated water. The highest frequency band corresponds to water molecules directly coordinated with the  $M'$  metal, while the intermediate frequency band is associated with water molecules loosely bound to the Ni atoms of the  $[\text{Ni}(\text{CN})_4]^{2-}$  blocks. It is important to note that these spectra represent hexahydrate form of the synthesized materials, consistent with the observed three types of water molecules. No TBA was detected in the IR spectra.

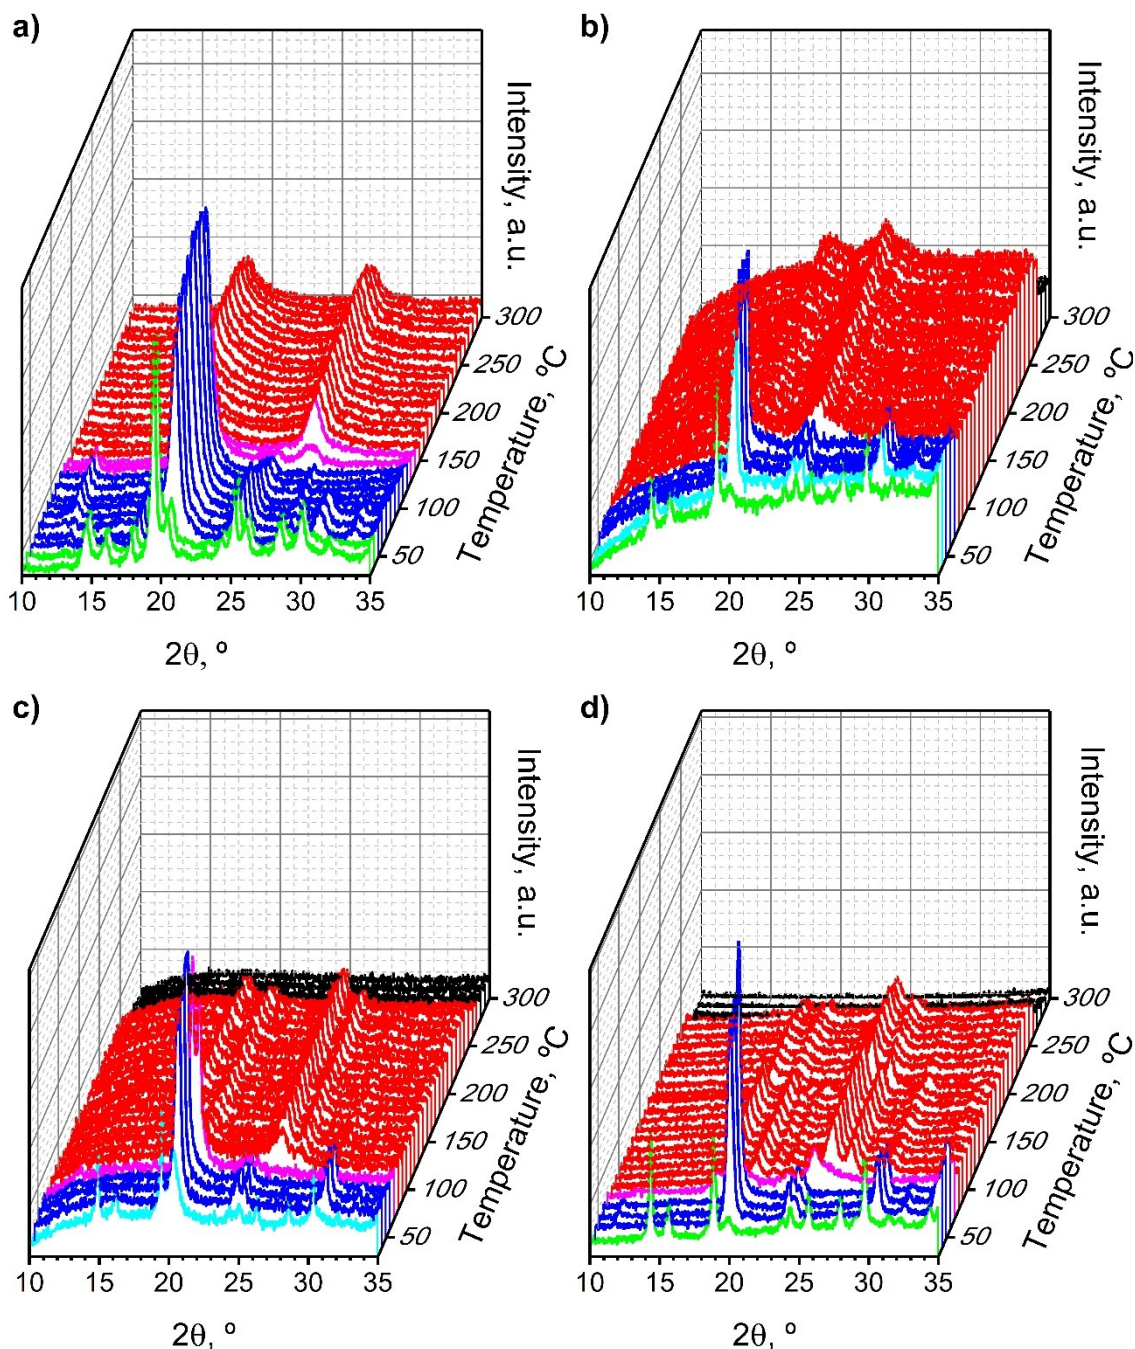

146

147 **Fig. S5.** HT-XRD plots of the synthesized 2D layered DMC materials in air: **a)** Ni-Ni, **b)**  
 148 Co-Ni, **c)** Fe-Ni and **d)** Mn-Ni. Color code: green (hexahydrate form), cyan (mix of hexa-  
 149 and trihydrate forms), blue (trihydrate form), magenta (mix of tri- and dehydrated forms),  
 150 red (dehydrated form), and black (product of decomposition).

151 Above 300 °C, all crystalline phases degrade, except for the Ni-Ni sample, which remains  
 152 stable up to 310 °C. The rest of the samples degrade at 280 °C (Co-Ni) and 260 °C (Fe-Ni  
 153 and Mn-Ni). Notably, a linear correlation exists between the degradation temperature  
 154 and the C≡N stretching vibrational energy ( $R^2 = 0.9843$ ) which essentially measures the  
 155 bond strength of the Ni-C≡N-M' chain.

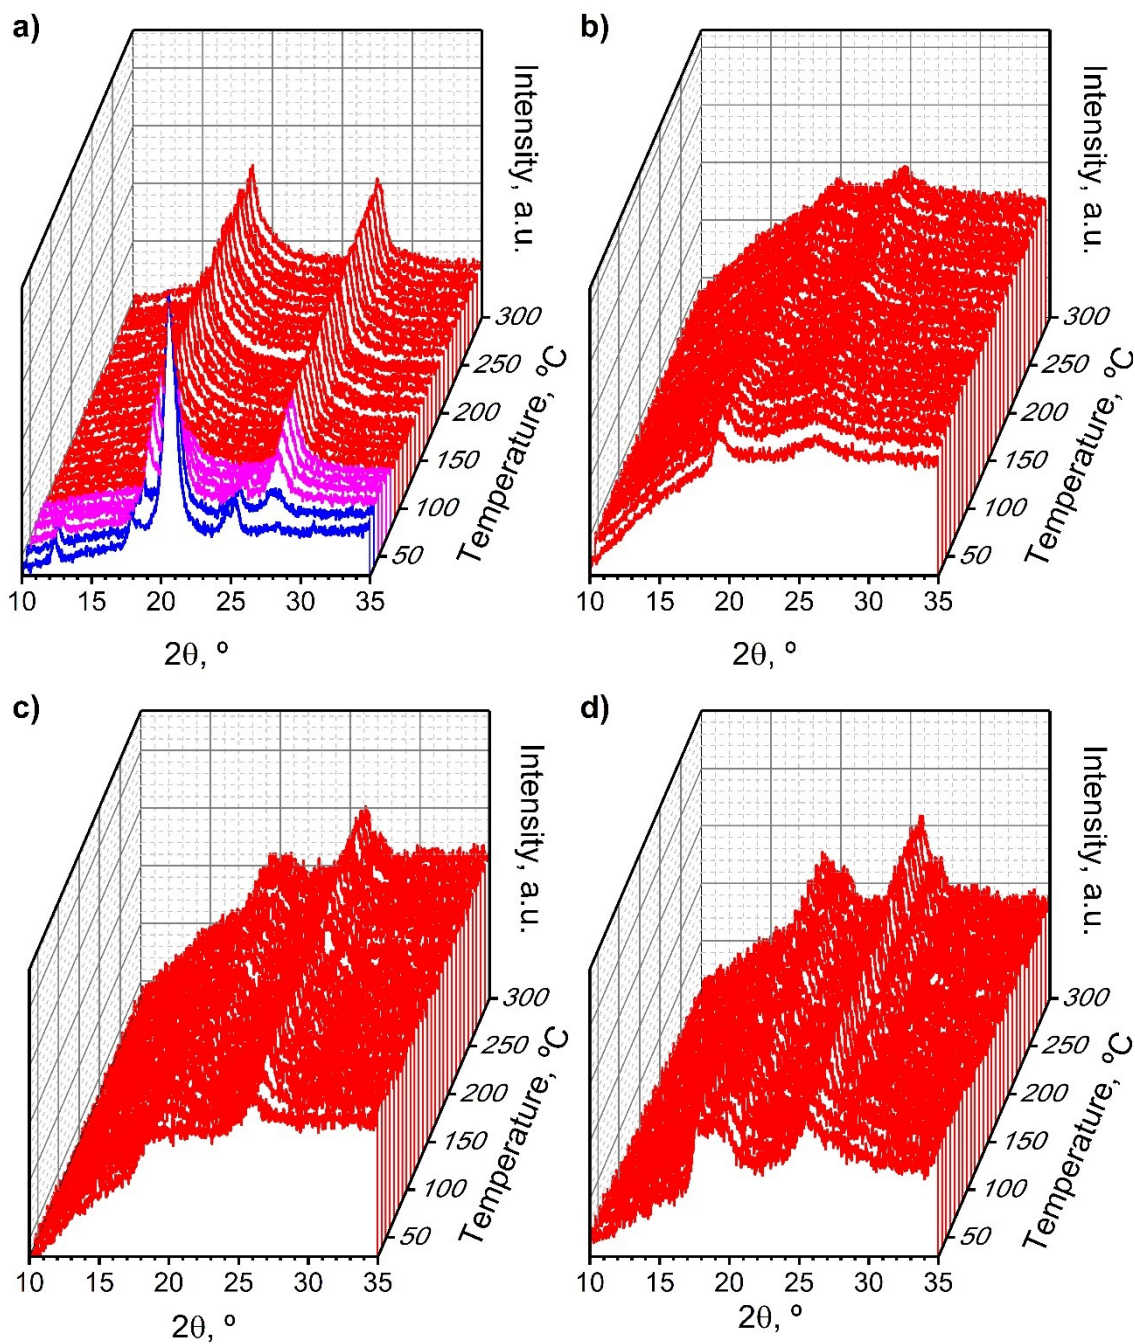

156

157 **Fig. S6.** HT-XRD plots of the synthesized 2D layered DMC materials in vacuum: **a)** Ni-  
 158 Ni, **b)** Co-Ni, **c)** Fe-Ni, and **d)** Mn-Ni. Color code: blue (trihydrate form), magenta (mix of  
 159 tri- and dehydrated forms) and red (dehydrated form).

160 Although dehydration occurs at low temperatures in vacuum, decomposition takes place  
 161 at significantly higher temperatures than in air, with all samples remaining stable even at  
 162 400 °C. This difference in the decomposition temperature arises from distinct  
 163 decomposition mechanism in air and vacuum. In air, DMCs oxidize to metal oxides,  
 164 whereas in inert atmospheres, they reduce to pure metals and metal carbides.<sup>4,5</sup>

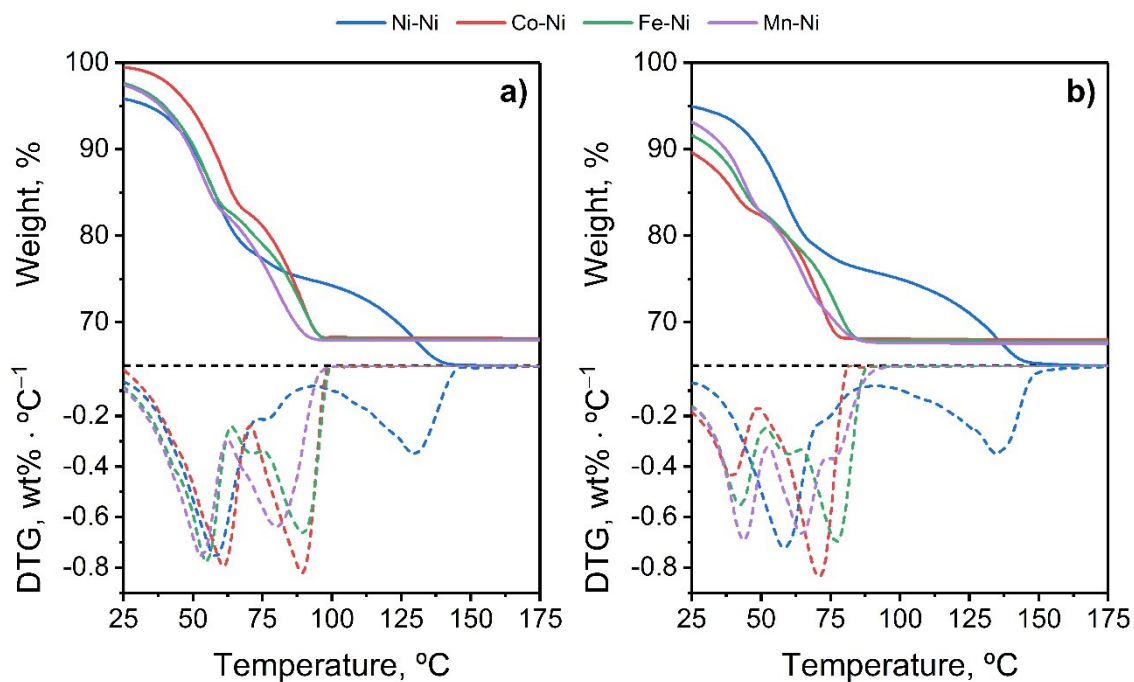

165  
 166 **Fig. S7.** TGA curves of the studied 2D layered DMC materials in the range between 25  
 167 °C and 175 °C in **a)** air and **b)** N<sub>2</sub>.

168 **Fig. S7** provides a detailed view of the stages of water weight loss. In the second stage,  
 169 two additional weight losses can be slightly differentiated, one corresponding to  
 170 coordinated water and the other to weakly linked water. However, the inflection point is  
 171 not well-defined. In N<sub>2</sub>, water is released even at room temperature.

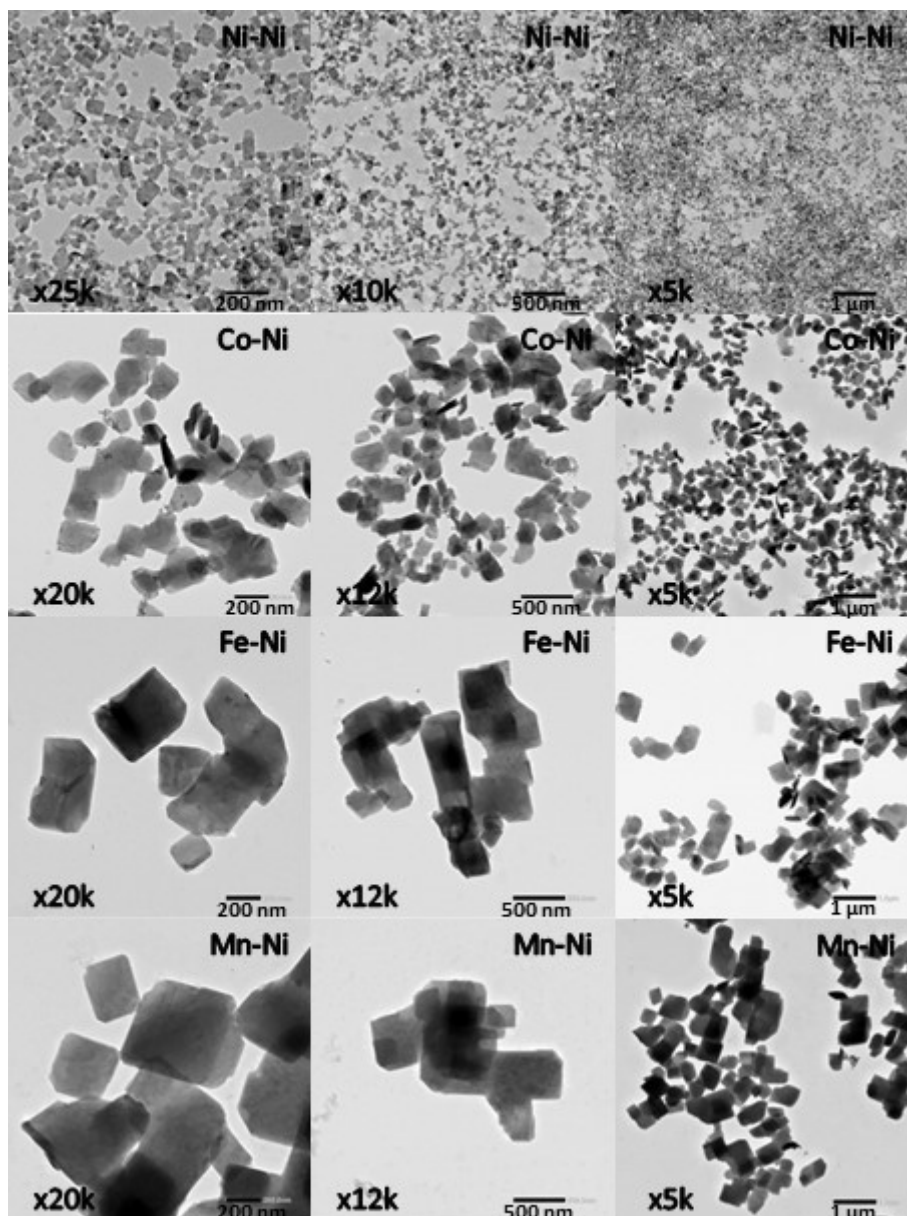

172

173 **Fig. S8.** TEM images of the studied 2D layered DMC materials at different magnifications.

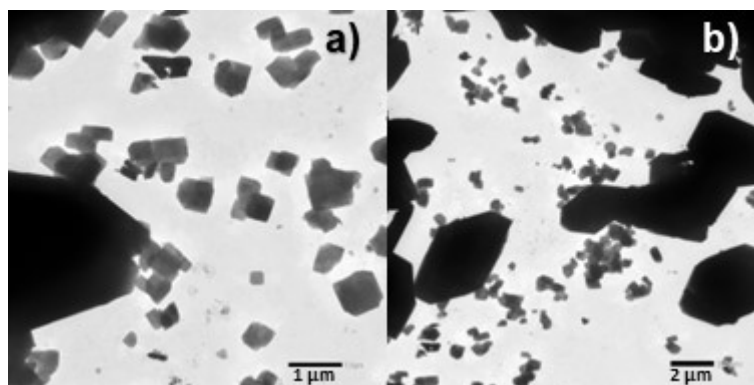

174

175 **Fig. S9.** TEM images of the Mn-Ni sample at a) 5000 and b) 2000 magnifications.

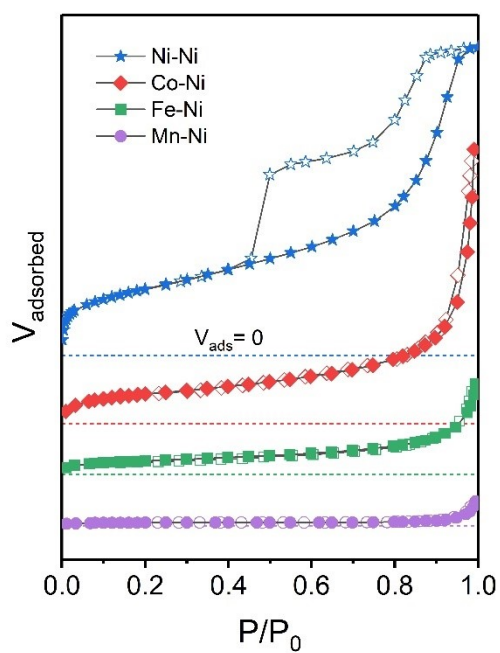

176

177 **Fig. S10.** N<sub>2</sub> adsorption-desorption isotherms of the studied 2D layered DMC materials.

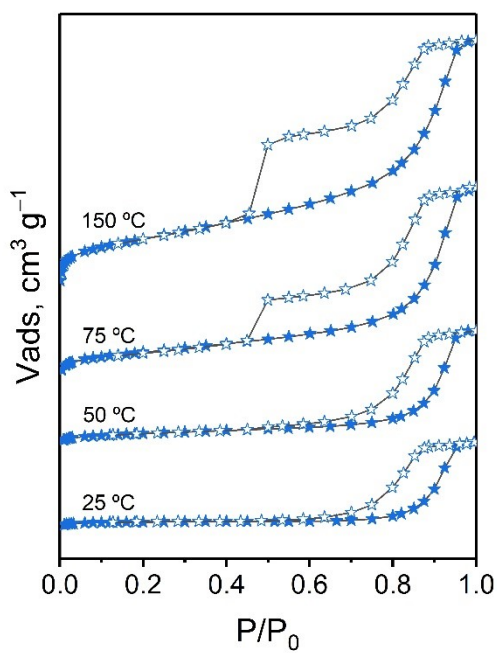

178

179 **Fig. S11.** N<sub>2</sub> adsorption-desorption isotherms of the Ni-Ni sample at different  
180 pretreatment temperatures.

181 **Table S2.** Textural properties of the Ni-Ni sample at different pretreatment temperatures.

| $T_{\text{pre}}, ^\circ\text{C}$ | $S_{\text{BET}}, \text{m}^2 \text{g}^{-1}$ | $V_{\text{p}}, \text{cm}^3 \text{g}^{-1}$ | $D_{\text{p}}^{\text{a}}, \text{nm}$ | $D_{\text{p}}^{\text{b}}, \text{nm}$ |
|----------------------------------|--------------------------------------------|-------------------------------------------|--------------------------------------|--------------------------------------|
| 25                               | 11.6                                       | 0.0463                                    | 20.5                                 | 11.7                                 |
| 50                               | 17.0                                       | 0.0601                                    | 18.6                                 | 10.4                                 |
| 75                               | 40.6                                       | 0.1035                                    | 12.7                                 | 6.9                                  |
| 150                              | 70.4                                       | 0.1345                                    | 8.7                                  | 5.3                                  |

182 <sup>a</sup> Determined from the BJH method applied to the adsorption branch.

183 <sup>b</sup> Determined from the BJH method applied to the desorption branch.

184 At low dehydration temperatures, the Ni-Ni sample displays a H2(b) hysteresis loop  
185 characteristic of complex porous structures with pore blocking affected desorption. As  
186 pretreatment temperature increases, a reduction in pore neck diameter is observed,  
187 leading to a pronounced step down in the hysteresis loop due to cavitation. The  
188 desorption branch-determined pore size is influenced by pore network effects, and it  
189 corresponds to the pore entrances, while the adsorption branch offers a more reliable  
190 pore size distribution. The increase in the specific surface area ( $S_{\text{BET}}$ ) and pore volume  
191 ( $V_{\text{p}}$ ) values, along with the decrease in pore diameter ( $D_{\text{p}}$ ) with pretreatment temperature,  
192 suggests that dehydration after thermal treatment results in more compact and porous  
193 Ni-Ni particle agglomerates.

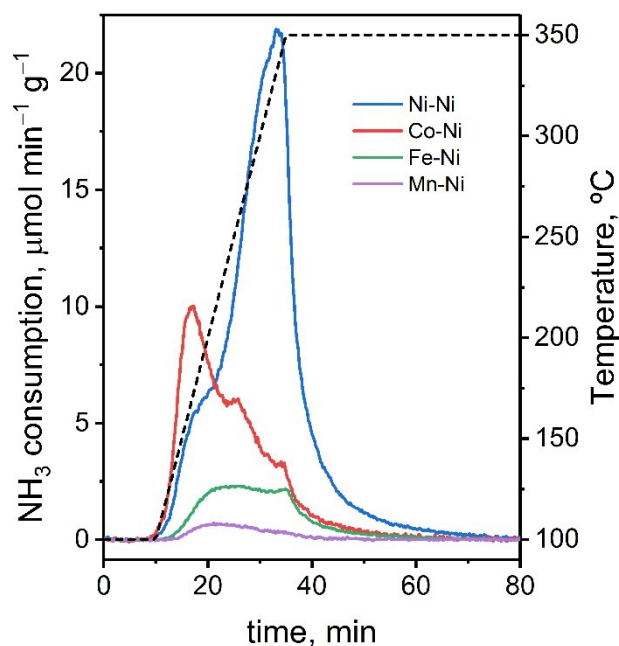

194

195 **Fig. S12.**  $\text{NH}_3$ -TPD profiles of the studied 2D layered DMC materials in the temperature  
196 range between 100 and 350 °C.

197 Some samples exhibit a peak truncated at 350 °C, which indicates that some  $\text{NH}_3$  might  
198 be lost at higher temperatures. **Table S3** presents the acid site strength distribution,  
199 using a 225 °C threshold temperature as an arbitrary criterion to differentiate weak and  
200 strong acid centers. In terms of percentage, the acid center strength decreases in the  
201 following order: Ni-Ni>Mn-Ni≈Fe-Ni>Co-Ni.

202 **Table S3.** Acid sites strength distribution for the studied 2D layered DMC materials.

| Catalyst | Acid Sites strength, $\mu\text{mol NH}_3 \text{ g}^{-1}$ |                     |
|----------|----------------------------------------------------------|---------------------|
|          | Weak <sup>a</sup>                                        | Strong <sup>b</sup> |
| Ni-Ni    | 53                                                       | 277                 |
| Co-Ni    | 81                                                       | 73                  |
| Fe-Ni    | 24                                                       | 30                  |
| Mn-Ni    | 5                                                        | 7                   |

203 <sup>a</sup> Acid sites between 100 °C and 225 °C.

204 <sup>b</sup> Acid sites between 225 °C and 350 °C.

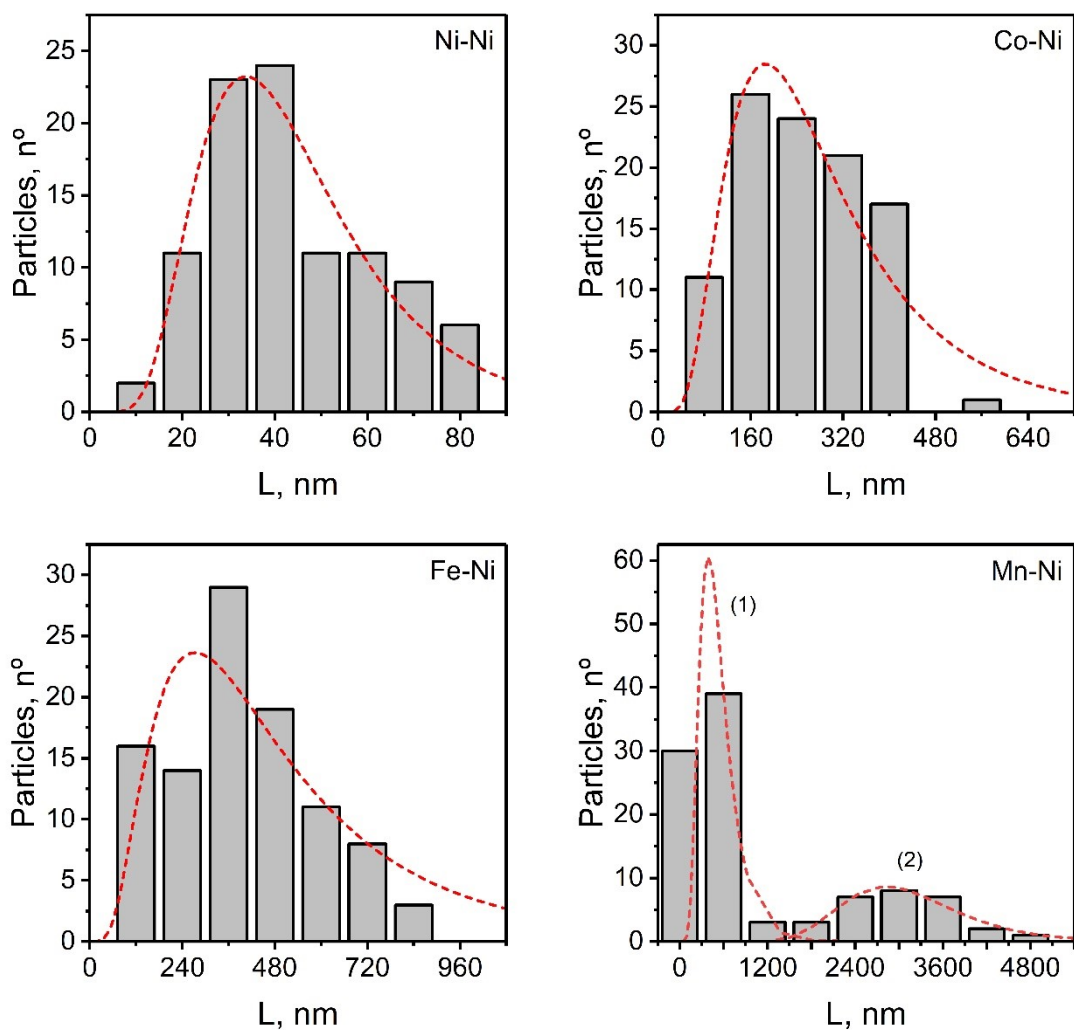

**Fig. S13.** Number-weighted in-plane size ( $L$ ) distribution of the studied 2D layered DMC materials.

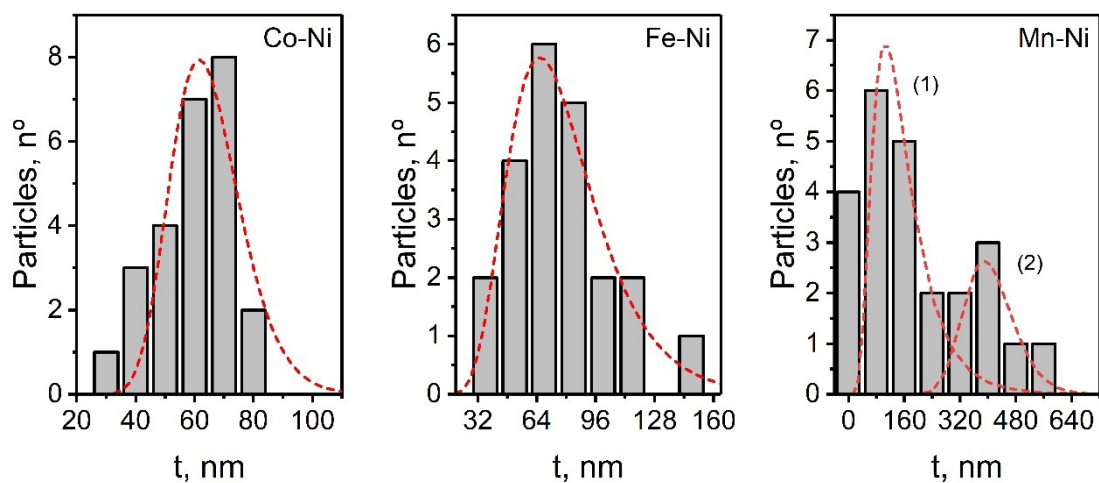

**Fig. S14.** Number-weighted lateral size ( $t$ ) distribution of the studied 2D layered DMC materials.

211 Number-weighted particle size distribution (PSD) was conducted using TEM images and  
 212 ImageJ software. The ferret diameter of particles defined the length (L), while the  
 213 minimum distance between the lateral face edges defined the thickness (t). For L  
 214 measurements, 100 particles were counted, while for t measurements, 20 to 25 particles  
 215 were counted. Data was fitted to the log-normal distribution. **Table S4** shows the most  
 216 relevant statistical parameters.

217 **Table S4.** Mode, median, mean ( $\mu$ ), standard deviation ( $\sigma$ ), standard error (SE) and R-  
 218 squared ( $R^2$ ) of the fitted peaks.

| Sample | Measurement | Mode | Median | $\mu$ | $\sigma$ | SE     | $R^2$  |
|--------|-------------|------|--------|-------|----------|--------|--------|
| Ni-Ni  | L           | 34   | 41     | 46    | 21.98    | 2.19   | 0.9076 |
|        | t           | -    | -      | -     | -        | -      | -      |
| Co-Ni  | L           | 189  | 253    | 295   | 177.14   | 17.71  | 0.8826 |
|        | t           | 62   | 64     | 65    | 12.29    | 2.45   | 0.8407 |
| Fe-Ni  | L           | 273  | 422    | 525   | 388.46   | 38.85  | 0.7281 |
|        | t           | 65   | 74     | 79    | 28.32    | 6.04   | 0.9268 |
| Mn-Ni  | L           | 397  | 482    | 535   | 258.99   | 30.52  | 0.9972 |
|        |             | 2818 | 3030   | 3144  | 870.03   | 164.00 |        |
|        | t           | 106  | 137    | 157   | 85.92    | 28.64  | 0.9827 |
|        |             | 391  | 402    | 408   | 72.46    | 32.41  |        |

**Table S5.** Comparison between experimental and expected values for surface area and acid sites density.

| Surface area, m <sup>2</sup> g <sup>-1</sup> |           |                               | Acid sites density, μmol m <sup>-2</sup> |            |                               |
|----------------------------------------------|-----------|-------------------------------|------------------------------------------|------------|-------------------------------|
| Experimental                                 | Geometric | e <sub>abs</sub> <sup>a</sup> | Experimental                             | Calculated | e <sub>abs</sub> <sup>a</sup> |
| 70.4                                         | 118.0     | 47.6                          | 4.68                                     | 3.24       | 1.44                          |
| 39.7                                         | 37.0      | 2.7                           | 3.87                                     | 3.19       | 0.68                          |
| 14.5                                         | 28.1      | 13.6                          | 3.72                                     | 3.12       | 0.59                          |
| 3.4                                          | 5.4       | 2.0                           | 3.51                                     | 3.07       | 0.44                          |

<sup>a</sup> Absolute error measured as the absolute difference between experimental and calculated values.

To calculate the geometric external surface area, the values of  $S_p$  and  $V_p$  extracted from TEM images (see **Table 2**) were used. As the samples are expected to be in their dehydrated form during TEM, N<sub>2</sub> physisorption, and NH<sub>3</sub>-TPD analyses, the solid density ( $\rho_{cal}$ ) was determined based on the crystal structure of the trihydrate form, excluding water molecules. The crystal structure of the dehydrated form was not employed for calculations, as it exhibits short-range order and is even unresolved for some samples considered here. For the Mn-Ni sample, the dimensions of the largest particles were used to determine the geometric external surface area. The density of surface M' metal sites, or the density of surface acid sites, was calculated from the crystal structure of the trihydrate phase. The unit cell dimensions were obtained from the XRD peak positions in patterns corresponding to the trihydrate form. To establish the position of the (002) plane, profile modeling was conducted in the corresponding angular region. **Table S6** shows some resolved crystallographic details.

The reason why the calculated acid site density values are lower than the experimental ones is that the calculations only consider the surface of the sheets, excluding defects, grain boundaries, and even the lateral sides of the particles. The absolute error is particularly high in the Ni-Ni sample, where surface defect density is expected to be higher and the  $r_p$  value is close to one. For specific surface areas, the absolute error between measured and calculated values can be attributed to particle agglomeration and the divergence between the actual sample density and that determined from the trihydrate model without water molecules. Although the latter may be a reasonable approximation, upon dehydration, 2D layered DMC complexes undergo negative thermal expansion within the sheets and a reduction in interlayer space, resulting in an increased particle density and consequently lower specific surface area values.

249 **Table S6.** Unit cell parameters, cell volume and calculated density of the trihydrate  
 250 form used for calculations.

|     | Catalysts               | Cell parameters, Å |        | V, Å <sup>3</sup> | ρ <sub>cal</sub> <sup>a</sup> , g cm <sup>-3</sup> |       |            |
|-----|-------------------------|--------------------|--------|-------------------|----------------------------------------------------|-------|------------|
|     | Ni-Ni                   | a:                 | 7.087  | 871               | 1.404                                              |       |            |
|     |                         | b:                 | 14.102 |                   |                                                    |       |            |
|     |                         | c:                 | 8.714  |                   |                                                    |       |            |
|     | Co-Ni                   | a:                 | 7.160  | 910               | 1.346                                              |       |            |
|     |                         | b:                 | 14.423 |                   |                                                    |       |            |
|     |                         | c:                 | 8.811  |                   |                                                    |       |            |
|     | Fe-Ni                   | a:                 | 7.273  | 936               | 1.281                                              |       |            |
|     |                         | b:                 | 14.432 |                   |                                                    |       |            |
|     |                         | c:                 | 8.918  |                   |                                                    |       |            |
|     | Mn-Ni                   | a:                 | 7.330  | 960               | 1.241                                              |       |            |
|     |                         | b:                 | 14.534 |                   |                                                    |       |            |
|     |                         | c:                 | 9.013  |                   |                                                    |       |            |
| 251 | <sup>a</sup> Calculated | unit               | cell   | density           | omitting                                           | water | molecules. |

252 **Table S7.** Chemical composition (in wt%) of the studied 2D layered DMC materials.

| Sample | M' <sup>a</sup> | M <sup>a</sup> | Cl <sup>a</sup> | M'/M,<br>at. at. <sup>-1</sup> | C <sup>b</sup> | N <sup>b</sup> | C/N,<br>at. at. <sup>-1</sup> | Estimated catalyst formulation                                 |
|--------|-----------------|----------------|-----------------|--------------------------------|----------------|----------------|-------------------------------|----------------------------------------------------------------|
| Ni-Ni  | M'=M: 56.4      |                | 3.8             | -                              | 19.2           | 20.7           | 1.08                          | -                                                              |
| Co-Ni  | 26.0            | 26.5           | 0.9             | 0.98                           | 22.0           | 24.5           | 1.05                          | Co <sub>0.98</sub> [Ni(CN) <sub>4.07</sub> ]Cl <sub>0.06</sub> |
| Fe-Ni  | 20.2            | 28.9           | 0.2             | 0.74                           | 24.5           | 26.2           | 1.09                          | Fe <sub>0.74</sub> [Ni(CN) <sub>3.80</sub> ]Cl <sub>0.01</sub> |
| Mn-Ni  | 19.5            | 28.5           | 0.2             | 0.73                           | 25.1           | 26.7           | 1.10                          | Mn <sub>0.73</sub> [Ni(CN) <sub>3.93</sub> ]Cl <sub>0.01</sub> |

253 <sup>a</sup> Determined from WDFRX and adjusted based on C and N values.

254 <sup>b</sup> Determined from elemental analysis.

255 WDXRF is a semi-quantitative technique. Therefore, inorganic content was adjusted based on C and N values derived from elemental analysis.

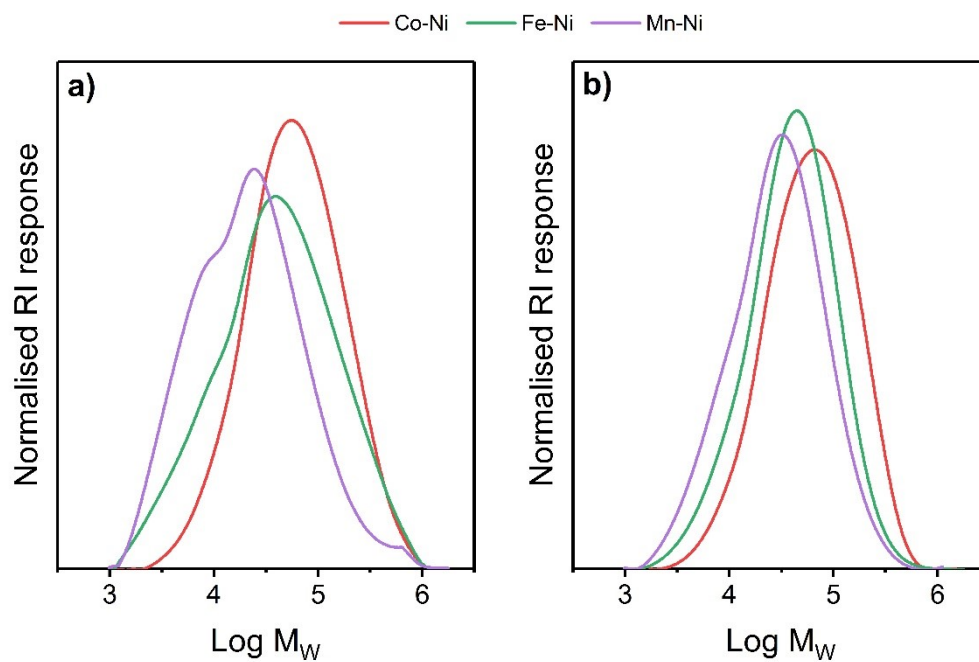

256

257 **Fig. S15.** SEC curves ( $\log M_w$ ) of the copolymers produced by the studied 2D layered  
 258 materials. **a)** At 90 °C and **b)** at 120 °C.

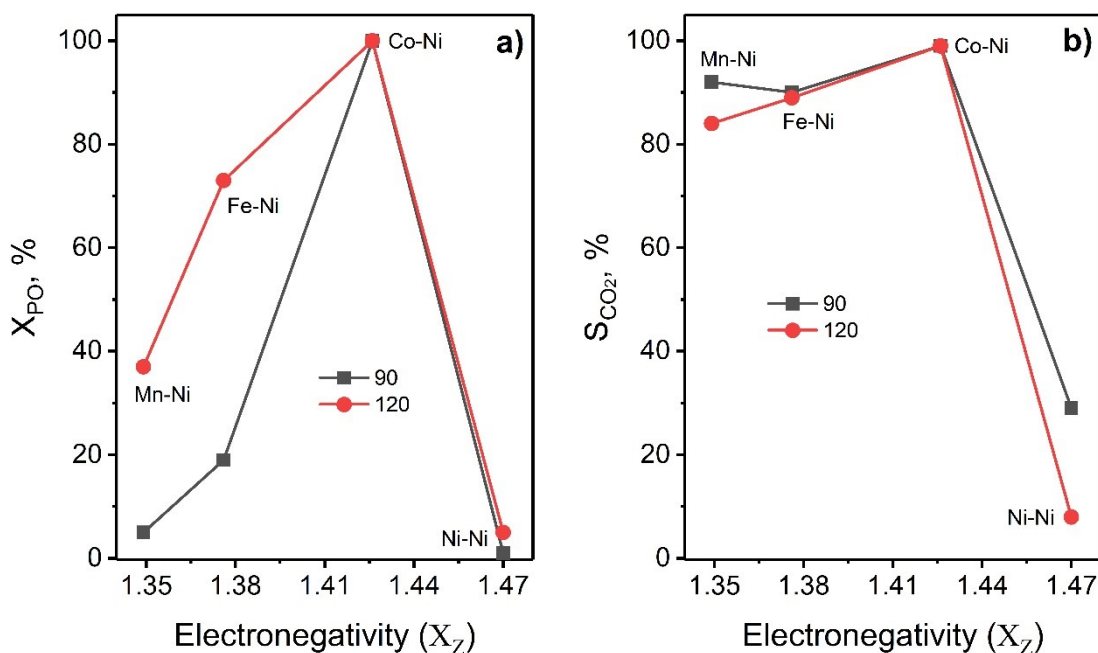

259  
260 **Fig. S16.** Relationship between electronegativity of the M' metal and a) PO conversion  
261 and b) CO<sub>2</sub> selectivity. Electronegativity values were extracted from the Zhang scale.<sup>1</sup>

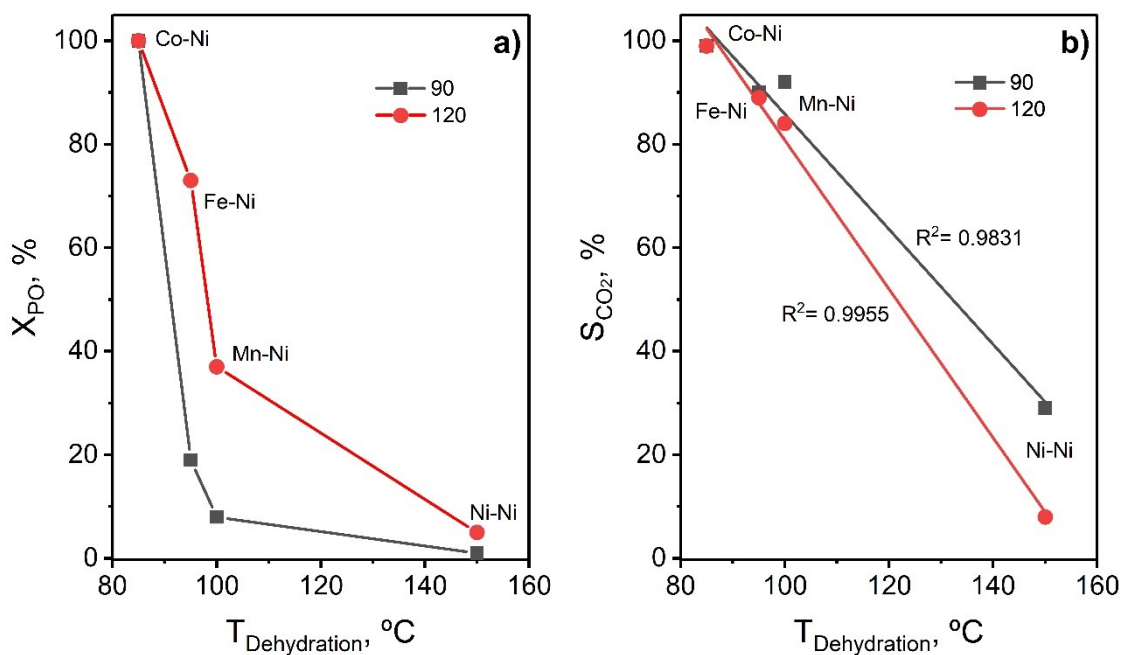

262  
263 **Fig. S17.** Relationship between dehydration temperature and a) PO conversion and b)  
264 CO<sub>2</sub> selectivity.

Entry 1 (Table 5)

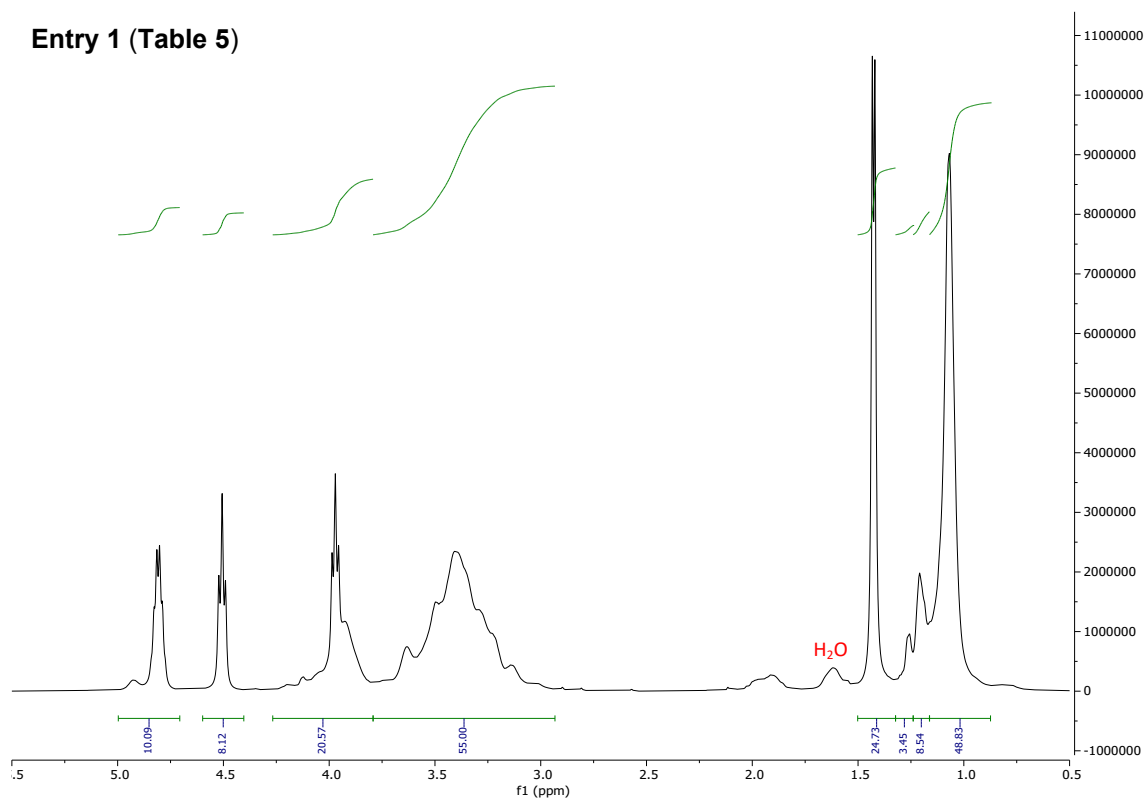

Fig. S18.  $^1\text{H}$ -NMR spectrum of the product derived from the Ni-Ni catalyst at 90 °C.

Entry 2 (Table 5)

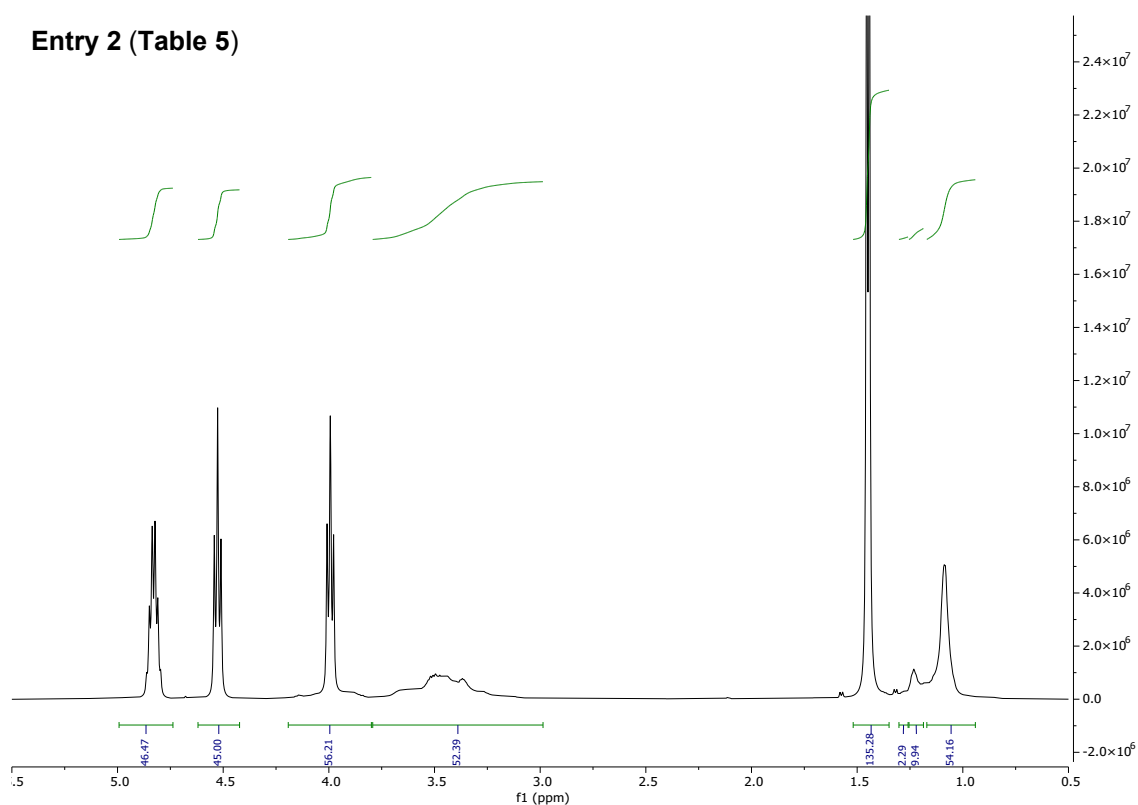

Fig. S19.  $^1\text{H}$ -NMR spectrum of the product derived from the Ni-Ni catalyst at 120 °C.

Entry 3 (Table 5)

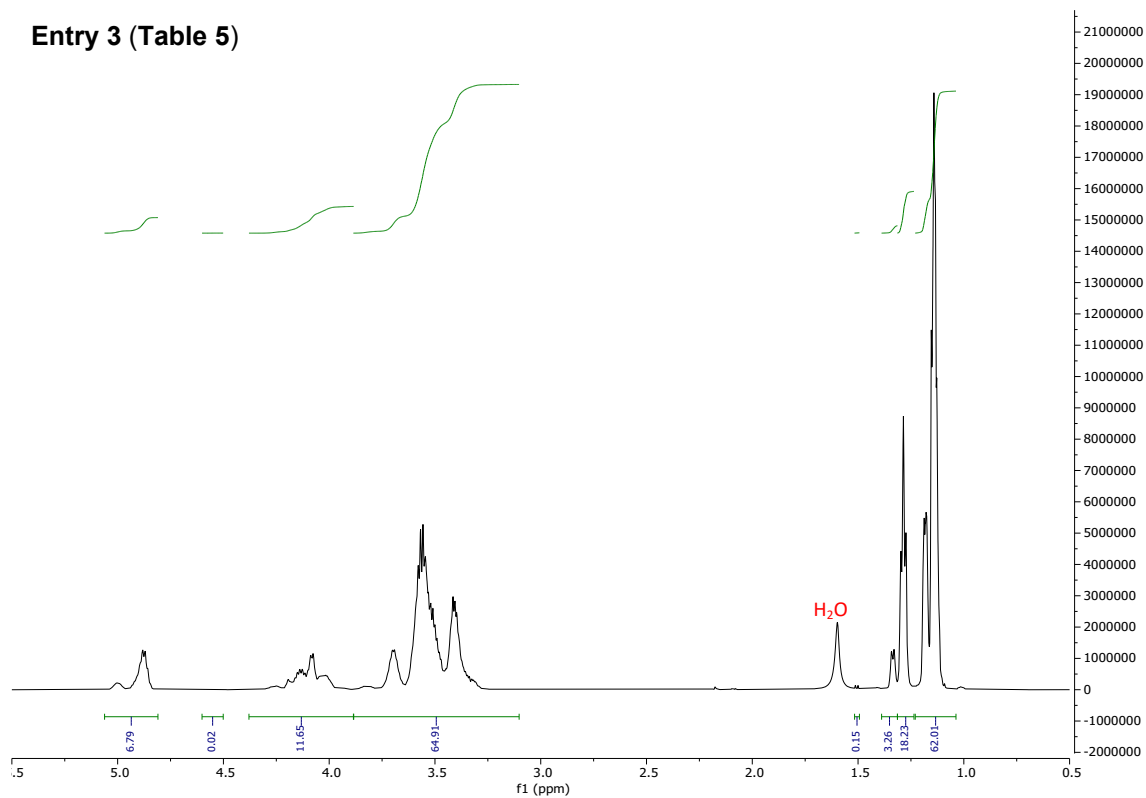

Fig. S20.  $^1\text{H}$ -NMR spectrum of the product derived from the Co-Ni catalyst at 90 °C.

Entry 4 (Table 5)

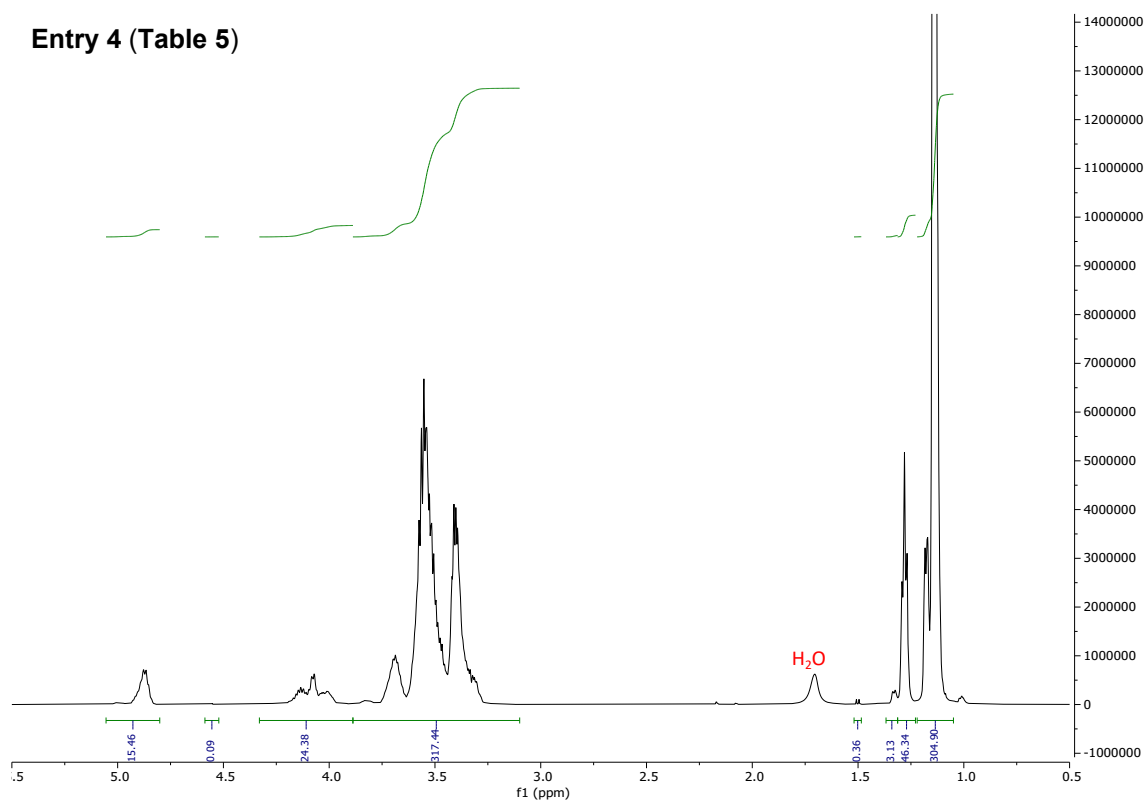

Fig. S21.  $^1\text{H}$ -NMR spectrum of the product derived from the Co-Ni catalyst at 120 °C.

Entry 5 (Table 5)

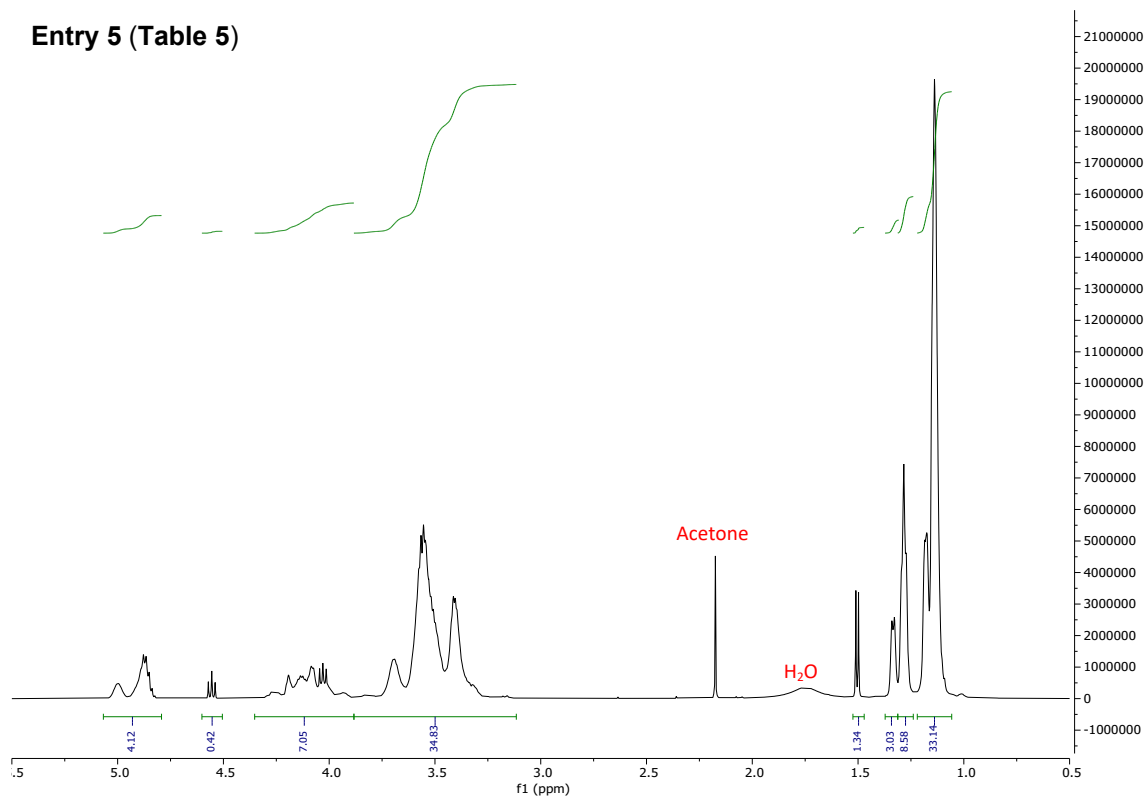

Fig. S22. <sup>1</sup>H-NMR spectrum of the product derived from the Fe-Ni catalyst at 90 °C.

Entry 6 (Table 5)

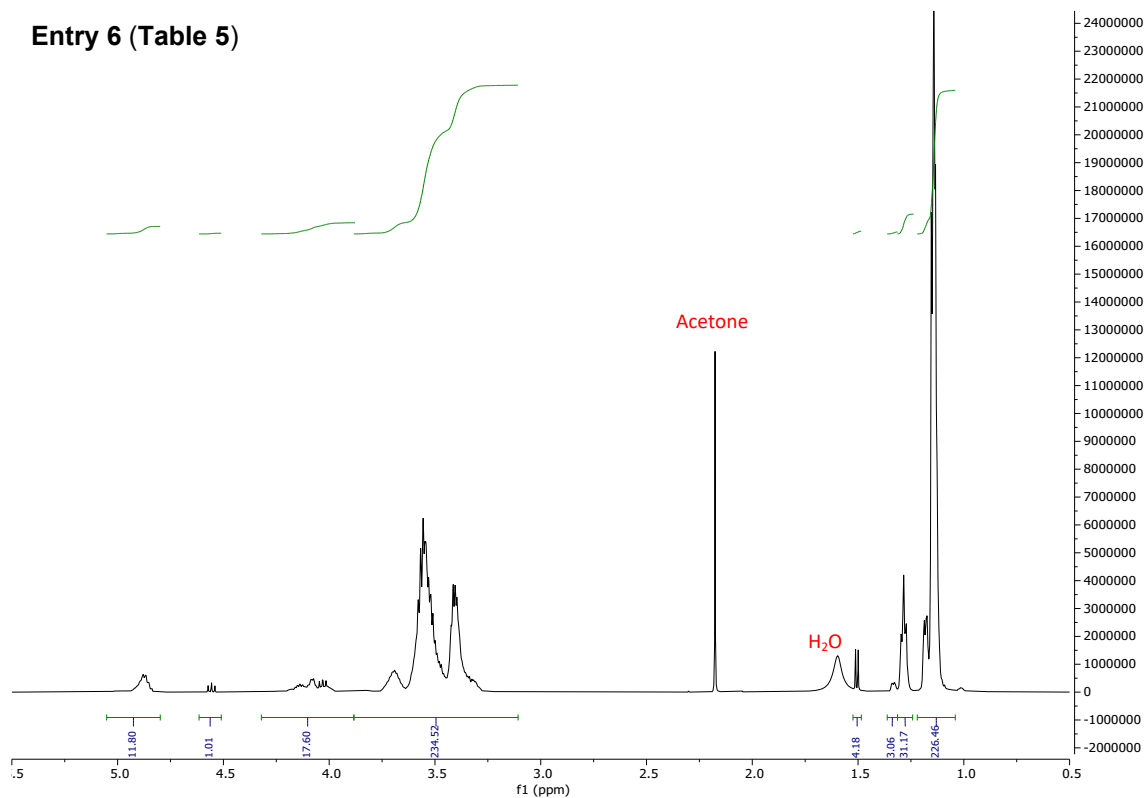

Fig. S23. <sup>1</sup>H-NMR spectrum of the product derived from the Fe-Ni catalyst at 120 °C.

Entry 7

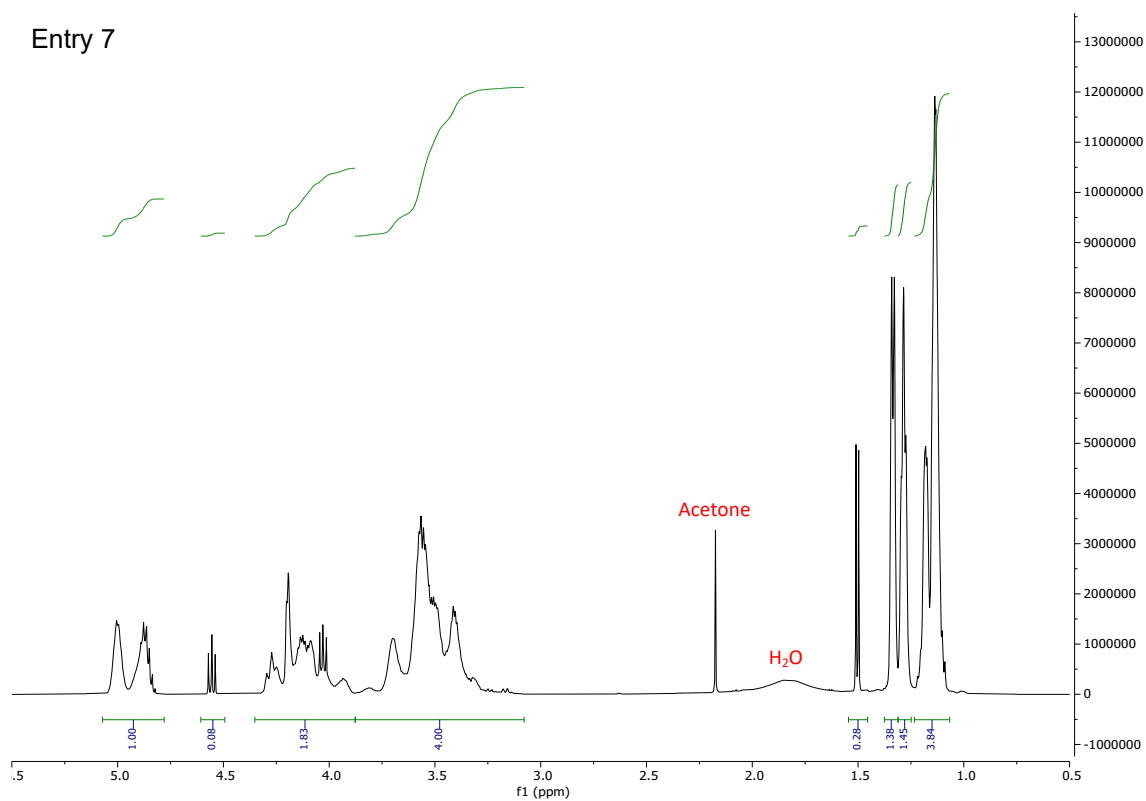

277  
278 **Fig. S24.**  $^1\text{H}$ -NMR spectrum of the product derived from the Mn-Ni catalyst at 90 °C.

Entry 8 (Table 5)

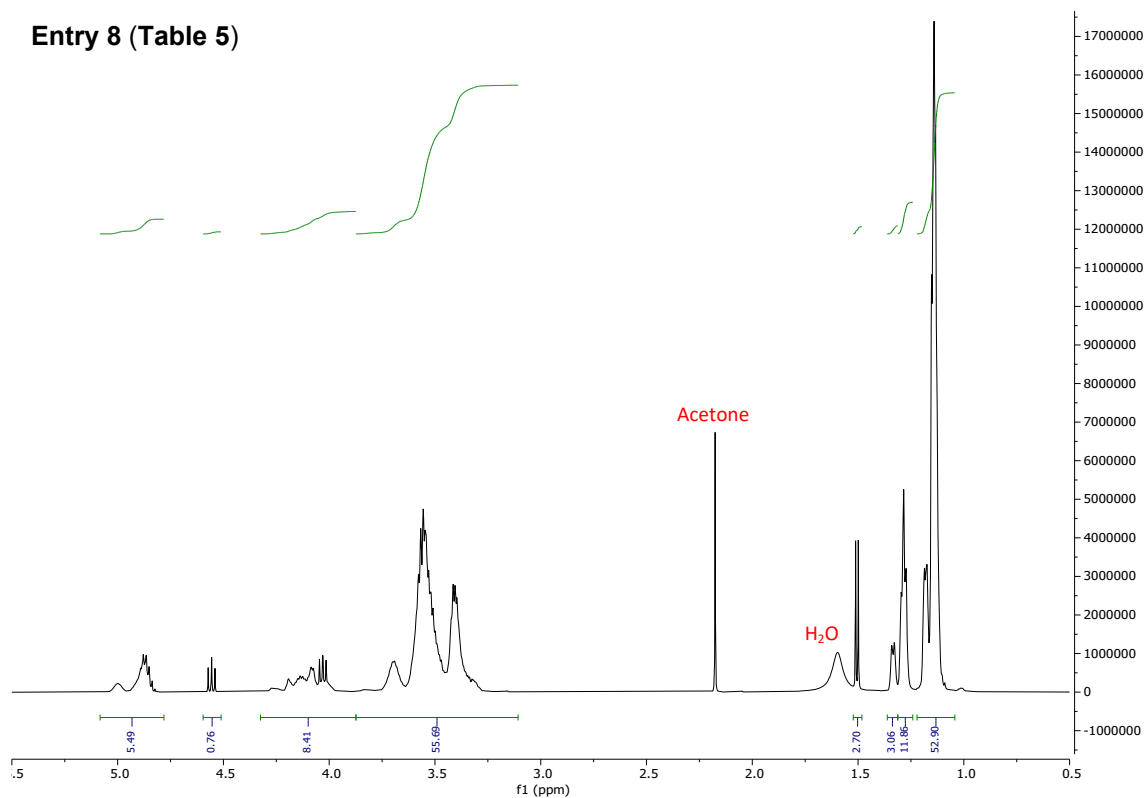

279  
280 **Fig. S25.**  $^1\text{H}$ -NMR spectrum of the product derived from the Mn-Ni catalyst at 120 °C.

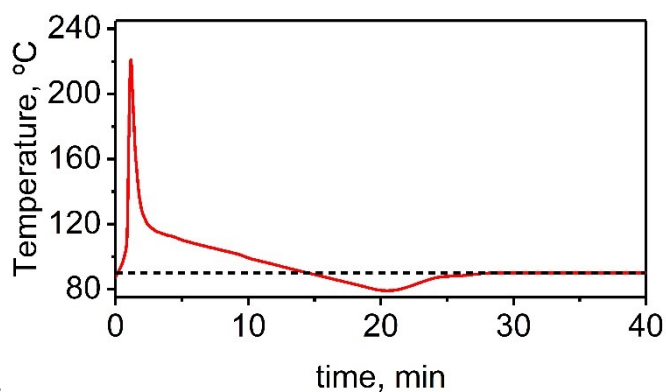

**Fig. S26.** Reactor temperature-time profiles for **entry 1 (Table 5)**.

After the induction period, the propagation rate becomes so rapid and the polymerization is so exothermic that the generated heat cannot be dissipated quickly enough, which leads to overheating. This temperature increase, in turn, triggers an autoacceleration process, causing the polymerization to reach maximum conversion in just a few minutes. However, such phenomenon negatively affects the catalytic performance of the Zn-Co DMC complex by i) deactivating it or reducing its activity,<sup>6</sup> ii) reducing CO<sub>2</sub> incorporation, iii) increasing PC production, iv) lowering molecular weights, and v) increasing dispersion.

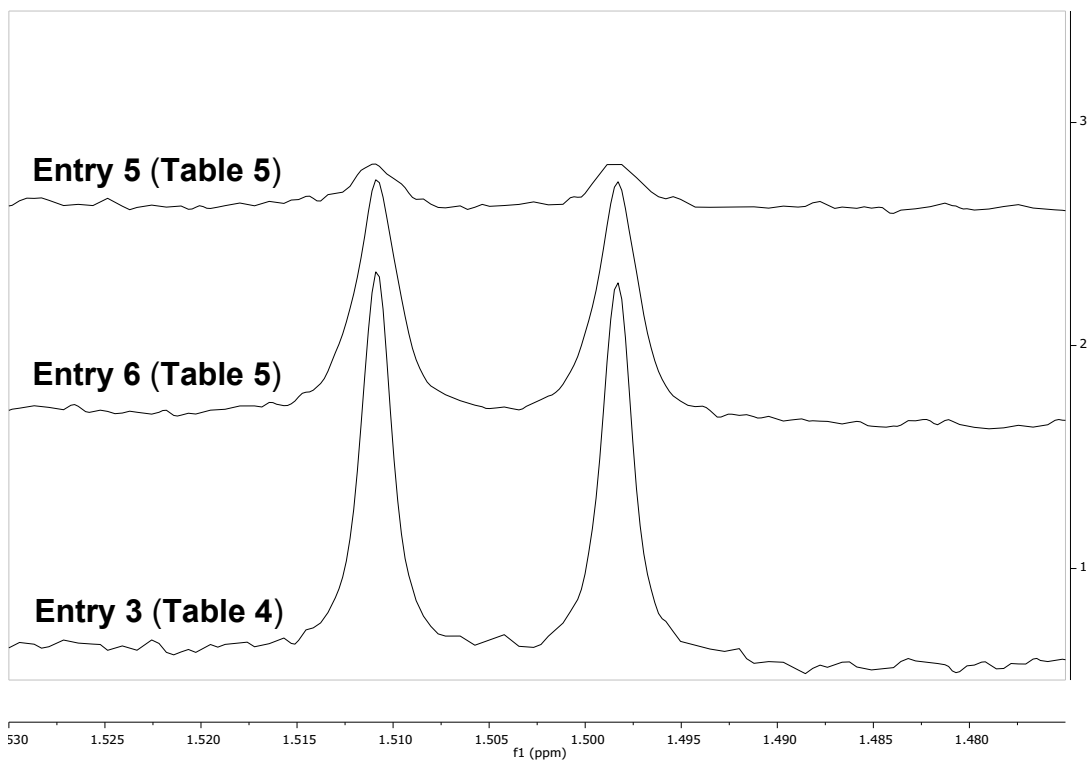

**Fig. S27.** <sup>1</sup>H-NMR region corresponding to the methyl resonance of PC (1.475-1.53 ppm) for **entry 5** and **entry 6 (Table 5)**, and **entry 3 (Table 4)**.

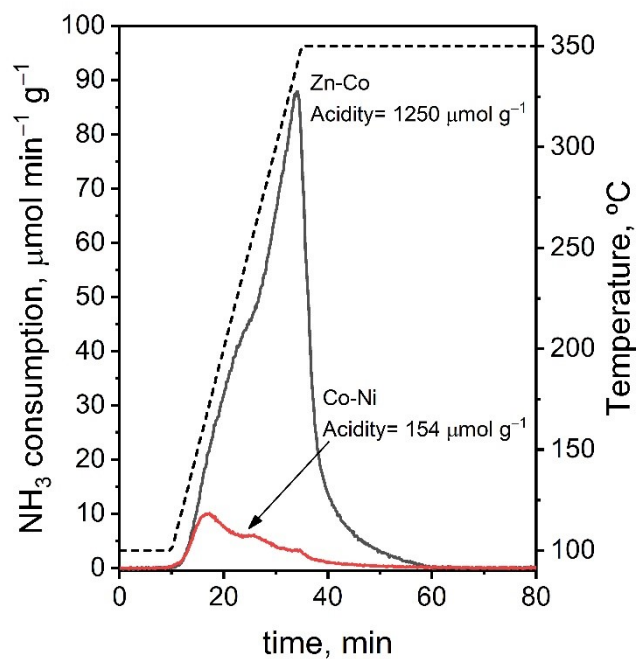

294

295 **Fig. S28.** NH<sub>3</sub>-TPD profiles of the Zn-Co DMC and Co-Ni DMC complexes in  
 296 the temperature range between 100 and 350 °C.

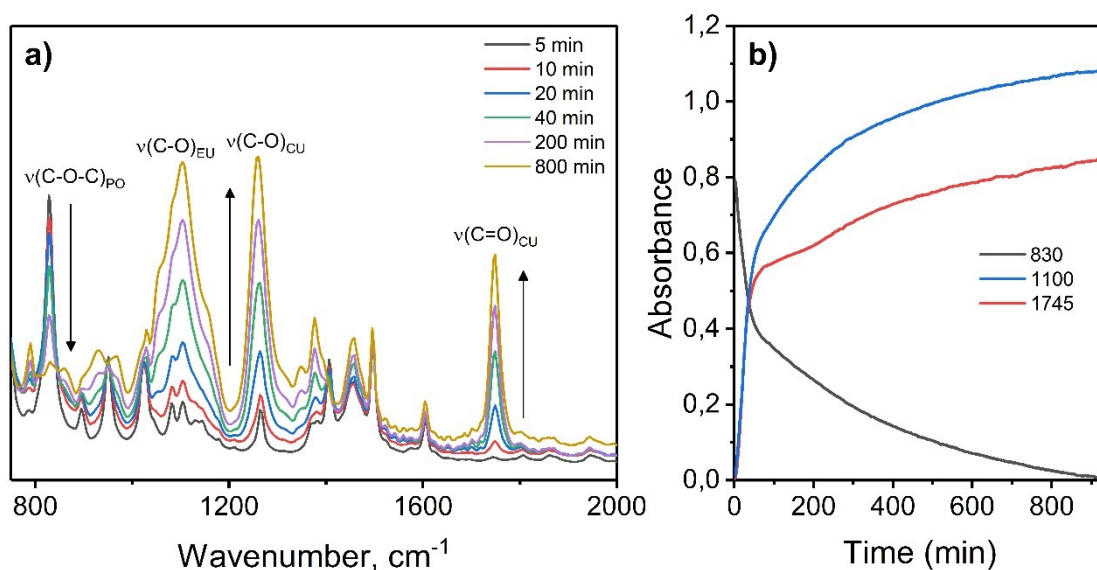

298

299 **Fig. S29.** a) IR spectra of reaction mixture during the copolymerization of CO<sub>2</sub> and PO in  
 300 the presence of the Co-Ni DMC catalyst; b) *In situ* IR monitoring of absorbance profiles  
 301 at frequencies indicated (in cm<sup>-1</sup>).

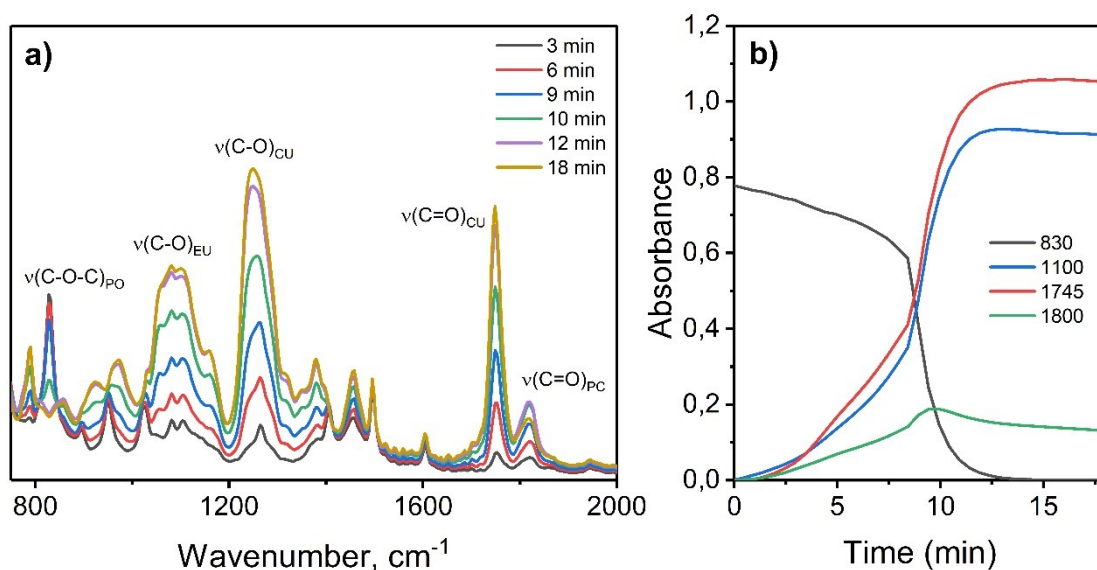

302

303 **Fig. S30.** IR spectra of reaction mixture during the copolymerization of CO<sub>2</sub> and PO in  
 304 the presence of the Zn-Co DMC catalyst; b) *In situ* IR monitoring of absorbance profiles  
 305 at frequencies indicated (in cm<sup>-1</sup>). The profile at 800 cm<sup>-1</sup> correspond to the PO starting  
 306 material, 1800 cm<sup>-1</sup> is the cyclic PC band, 1745 cm<sup>-1</sup> is the PPC carbonyl band, and  
 307 1100 cm<sup>-1</sup> is the PPC ether band.

308 The evolution of the concentration of PO in the reaction mixture can be calculated  
 309 by following the evolution with time of the IR signal at 830 cm<sup>-1</sup>, which is  
 310 associated to the  $\nu(\text{C-O-C})$  stretching mode of PO. According to the Beer-  
 311 Lambert law, the absorbance of the peak at 830 cm<sup>-1</sup> at any time t ( $A_t$ ), is directly  
 312 proportional to the product of the molar absorptivity ( $\epsilon_{830}$ ), the optical path length  
 313 (L) and the concentration of PO at such time t ( $[\text{PO}]_t$ ).

$$A_t = \epsilon_{830} \cdot L \cdot [\text{PO}]_t \quad (\text{S8})$$

314 Of course, the equation can be also applied for t=0.

$$A_0 = \epsilon_{830} \cdot L \cdot [\text{PO}]_0 \quad (\text{S9})$$

315 Combining **eqn. (S8)** with **eqn. (S9)**, an expression is obtained that relates  
 316 changes in the absorbance of the signal at 830 cm<sup>-1</sup> with changes in the  
 317 concentration of PO:

$$\frac{A_t}{A_0} = \frac{[\text{PO}]_t}{[\text{PO}]_0} \quad (\text{S10})$$

318 Therefore, the conversion of PO ( $X_{\text{PO}}$ ) at each instant t can be calculated from  
 319 the evolution of the absorbance of the peak at 830 cm<sup>-1</sup>.

$$X_{\text{PO}} = 1 - \frac{[\text{PO}]_t}{[\text{PO}]_0} = 1 - \frac{A_t}{A_0} \quad (\text{S11})$$

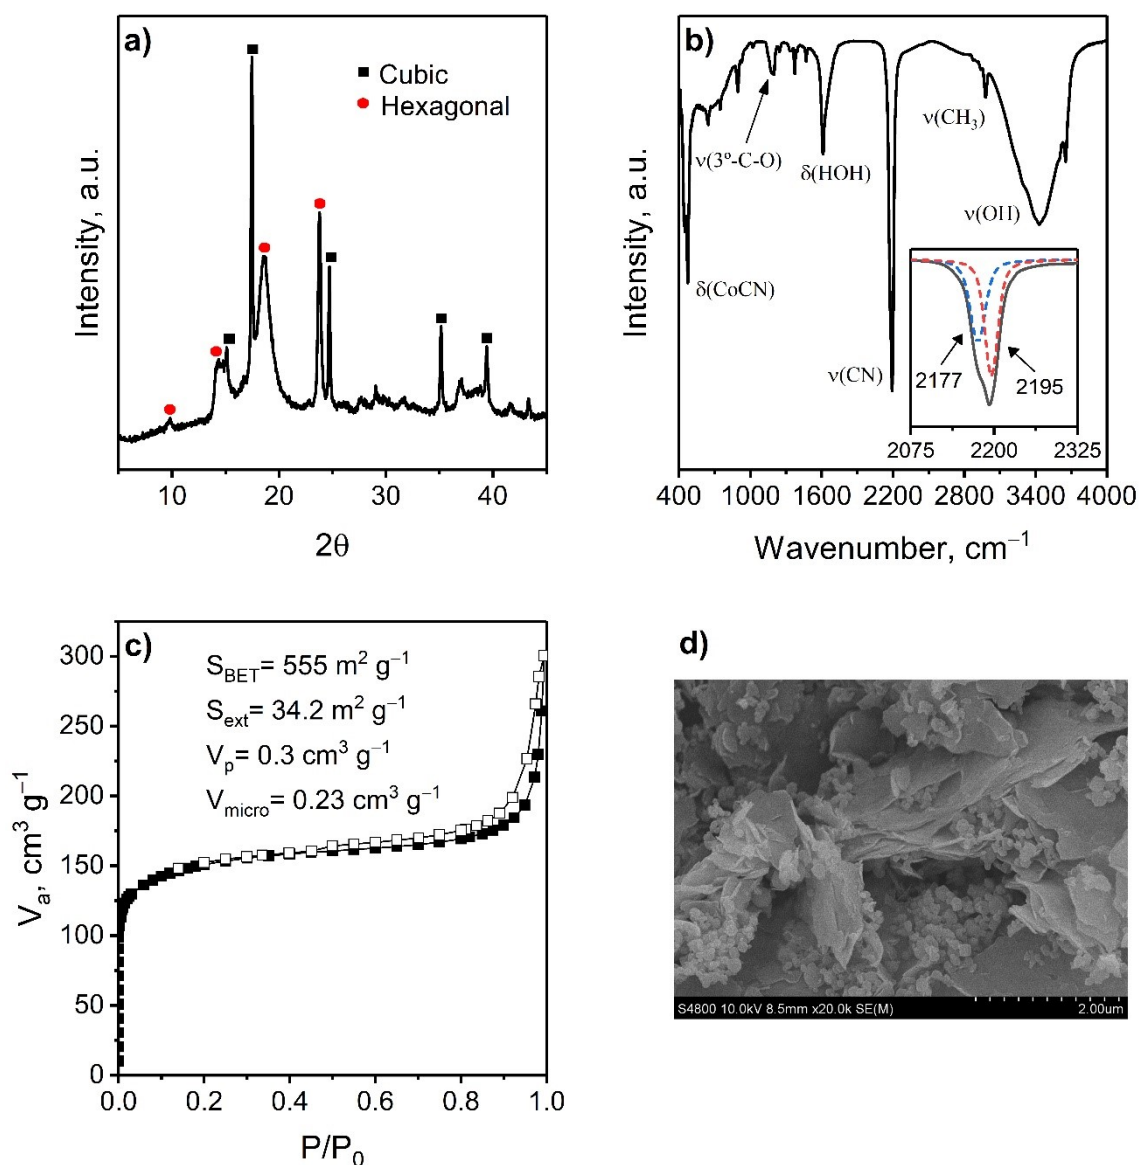

321  
 322 **Fig. S31.** Basic characterization of the Zn-Co DMC catalyst. **a)** XRD spectrum, **b)**  
 323 FT-IR spectrum (Inset:  $\nu(\text{CN})$  spectral region), **c)**  $\text{N}_2$  physisorption isotherm and **d)** SEM  
 324 image.

325 The Zn-Co DMC complex employed was synthesized following the procedure described  
 326 in the manuscript for the 2D layered DMC compounds.

327 According to the XRD pattern (**Fig. S27.a**), the material obtained was composed of two  
 328 well-differentiated crystallographic phases. The expected 3D cubic lattice structure (■,  
 329 ICDD 01-076-5029), in which both the  $[\text{Co}(\text{CN})_6]^{3-}$  molecular block and the  $\text{Zn}^{2+}$  cation  
 330 adopt a six-fold coordination, and a laminar structure with hexagonal unit cell (◆) in which  
 331 the molecular block retains its octahedral coordination but  $\text{Zn}^{2+}$  takes a tetragonal

332 coordination geometry. The layers extend in the ab-plane and are connected to each  
333 other by Cl atoms and/or TBA molecules.<sup>7</sup>

334 The coexistence of both crystallographic phases can be easily discerned by observing  
335 the  $\nu(\text{CN})$  region of the IR spectrum (inset in **Fig. S27.b**). The deconvolution returns two  
336 peaks, one at  $2177\text{ cm}^{-1}$  associated with the cubic phase, and another at  $2195\text{ cm}^{-1}$   
337 associated with the layered phase. In addition, in the FT-IR spectrum it can be observed  
338 how the Zn-Co DMC complex retains appreciable amounts of TBA in its structure, as  
339 well as water.

340 In  $\text{N}_2$  adsorption-desorption isotherm (**Fig. S27.c**), a very large initial  $\text{N}_2$  adsorption is  
341 observed, which warns of the presence of micropores in the structure. At the same time,  
342 a hysteresis loop of the type H4 is observed, which is related to narrow slit-like pores  
343 derived from aggregates of layered materials.<sup>8</sup>

344 The SEM image (**Fig. S27.d**) provides a clear view of the lamellar structure surrounded  
345 by small pseudo cubic particles.

## 346 REFERENCES

- 347 1 Y. Zhang, *Inorg. Chem.*, 1982, 21, 3886-3889.  
348 2 Y. Zhang, *Inorg. Chem.*, 1982, 21, 3889-3893.  
349 3 R. L. McCullough, L. H. Jones, G. A. Crosby, *Spectrochim. Acta*, 1960, 16, 929-  
350 944.  
351 4 D. P. Domonov, S. I. Pechenyuk, Y. P. Semushina, *J. Therm. Anal. Calorim.*,  
352 2021, 146, 629-635.  
353 5 C. Aparicio, L. Machala, Z. Marusak, *J. Them. Anal. Calorim.*, 2012, 110, 661-  
354 669.  
355 6 I. Kim, J.T. Ahn, C. S. Ha, C. S. Yang, I. Park, *Polymer*, 2003, 44, 3417-3428.  
356 7 N. Almora-Barrios, S. Pogodin, L. Bellarosa, M. García-Melchor, G. Revilla-  
357 López, M. García-Ratés, A. B. Vázquez-García, P. Hernández-Ariznavarreta,  
358 N. López, *ChemCatChem*, 2015, 7, 928-935.  
359 8 K. S. W. Sing, D. H. Everett, R. A. W. Haul, L. Moscou, R. A. Pierotti, J.  
360 Rouquerol, T. Siemieniowska, *Pure & Appl. Chem.*, 1985, 57, 603-619.
